# Supplementary material for: ESIPT-Capable 4-(2-Hydroxyphenyl)-2-(Pyridin-2-yl)-1H-Imidazoles with Single and Double Proton Transfer: Synthesis, Selective Reduction of the Imidazolic OH Group and Luminescence
Source: MDPI journal article supplement (doi:10.3390/molecules28041793), 2023-02-14
Supplement: s1 [file s1]

## **ESIPT-capable 4-(2-hydroxyphenyl)-2-(pyridin-2-yl)- 1*H*-imidazoles with single and double proton transfer: synthesis, selective reduction of the imidazolic OH group and luminescence**

Nikita A. Shekhovtsov <sup>1,\*</sup>, Elena B. Nikolaenkova <sup>2</sup>, Alexey A. Ryadun <sup>1</sup>, Denis G. Samsonenko <sup>1</sup>,  
Alexsei Ya. Tikhonov <sup>2,\*</sup> Mark B. Bushuev <sup>1,\*</sup>

<sup>1</sup> Nikolaev Institute of Inorganic Chemistry, Siberian Branch of Russian Academy of Sciences, 3, Acad. Lavrentiev Ave., Novosibirsk, 630090, Russia.

<sup>2</sup> N. N. Vorozhtsov Novosibirsk Institute of Organic Chemistry, Siberian Branch of Russian Academy of Sciences, 9, Acad. Lavrentiev Ave., Novosibirsk, 630090, Russia.

Correspondence: shekhovtsov@niic.nsc.ru (Nikita A. Shekhovtsov), alyatikh@nioch.nsc.ru (Alexsei Ya. Tikhonov), bushuev@niic.nsc.ru (Mark B. Bushuev).

## Table of Contents

|                         |    |
|-------------------------|----|
| Spectral data .....     | 3  |
| Figure S1 .....         | 3  |
| Figure S2 .....         | 3  |
| Figure S3 .....         | 4  |
| Figure S4 .....         | 5  |
| Figure S5 .....         | 5  |
| Figure S6 .....         | 6  |
| Figure S7 .....         | 7  |
| Figure S8 .....         | 7  |
| Structural data.....    | 8  |
| Table S1 .....          | 8  |
| Table S2 .....          | 9  |
| Figure S9 .....         | 12 |
| Figure S10 .....        | 12 |
| Figure S11 .....        | 12 |
| Photophysical data..... | 13 |
| Figure S12 .....        | 13 |
| Figure S13 .....        | 13 |
| Figure S14 .....        | 14 |
| Figure S15 .....        | 15 |
| Theoretical data .....  | 16 |
| Table S3 .....          | 16 |
| Table S4 .....          | 17 |
| Table S5 .....          | 18 |
| Table S6 .....          | 19 |
| Table S7 .....          | 20 |
| Table S8 .....          | 21 |
| Table S9 .....          | 22 |
| Table S10 .....         | 23 |
| Table S11 .....         | 24 |
| Table S12 .....         | 25 |
| Table S13 .....         | 26 |
| Table S14 .....         | 27 |
| Table S15 .....         | 28 |
| Table S16 .....         | 29 |

## Spectral data

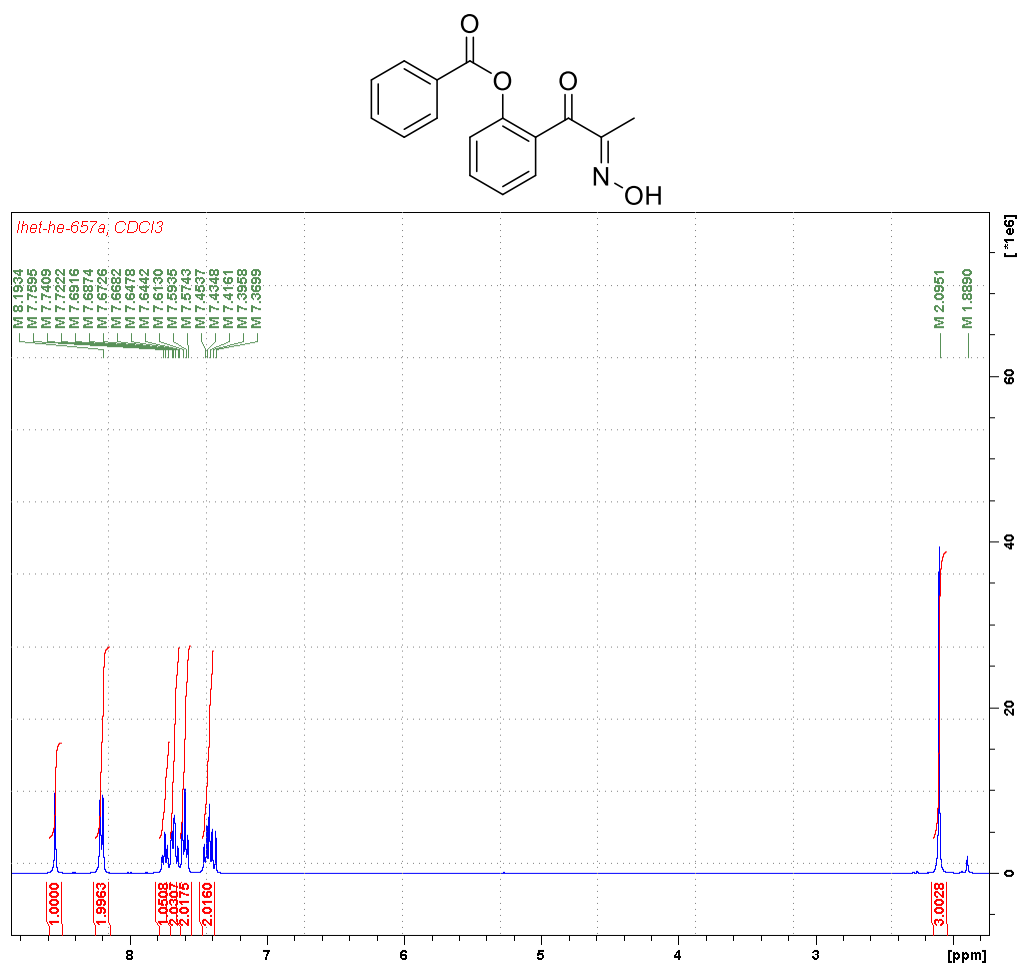

Figure S1. <sup>1</sup>H NMR spectrum of 1-(2-benzoyloxyphenyl)-2-(hydroxyimino)propan-1-one (in CDCl<sub>3</sub>).

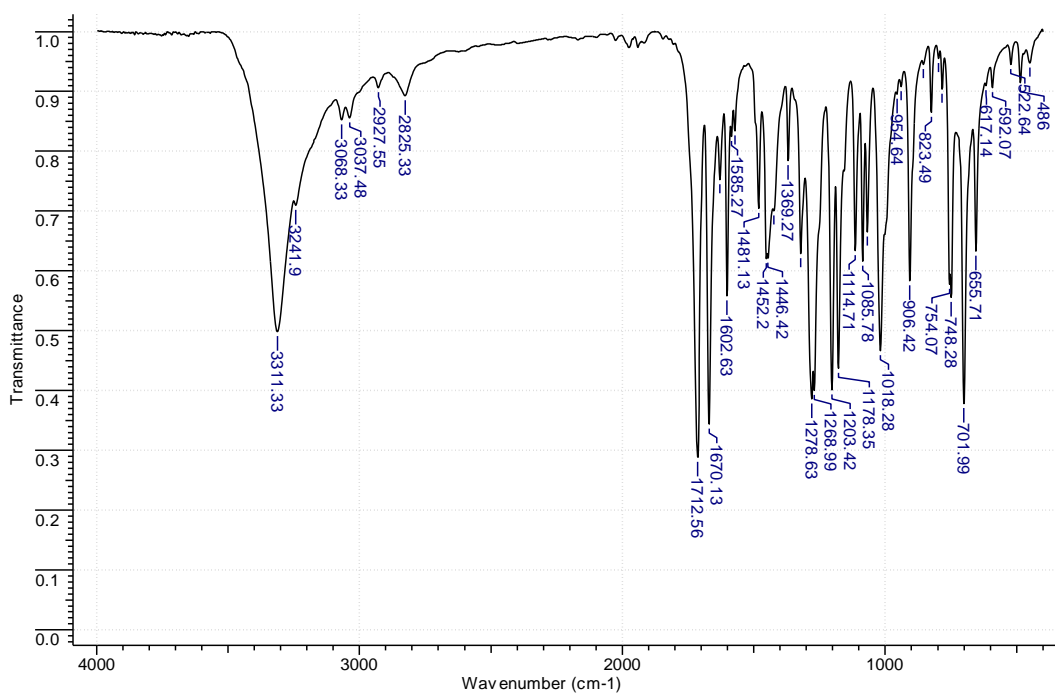

Figure S2. IR spectrum of 1-(2-benzoyloxyphenyl)-2-(hydroxyimino)propan-1-one (in KBr).

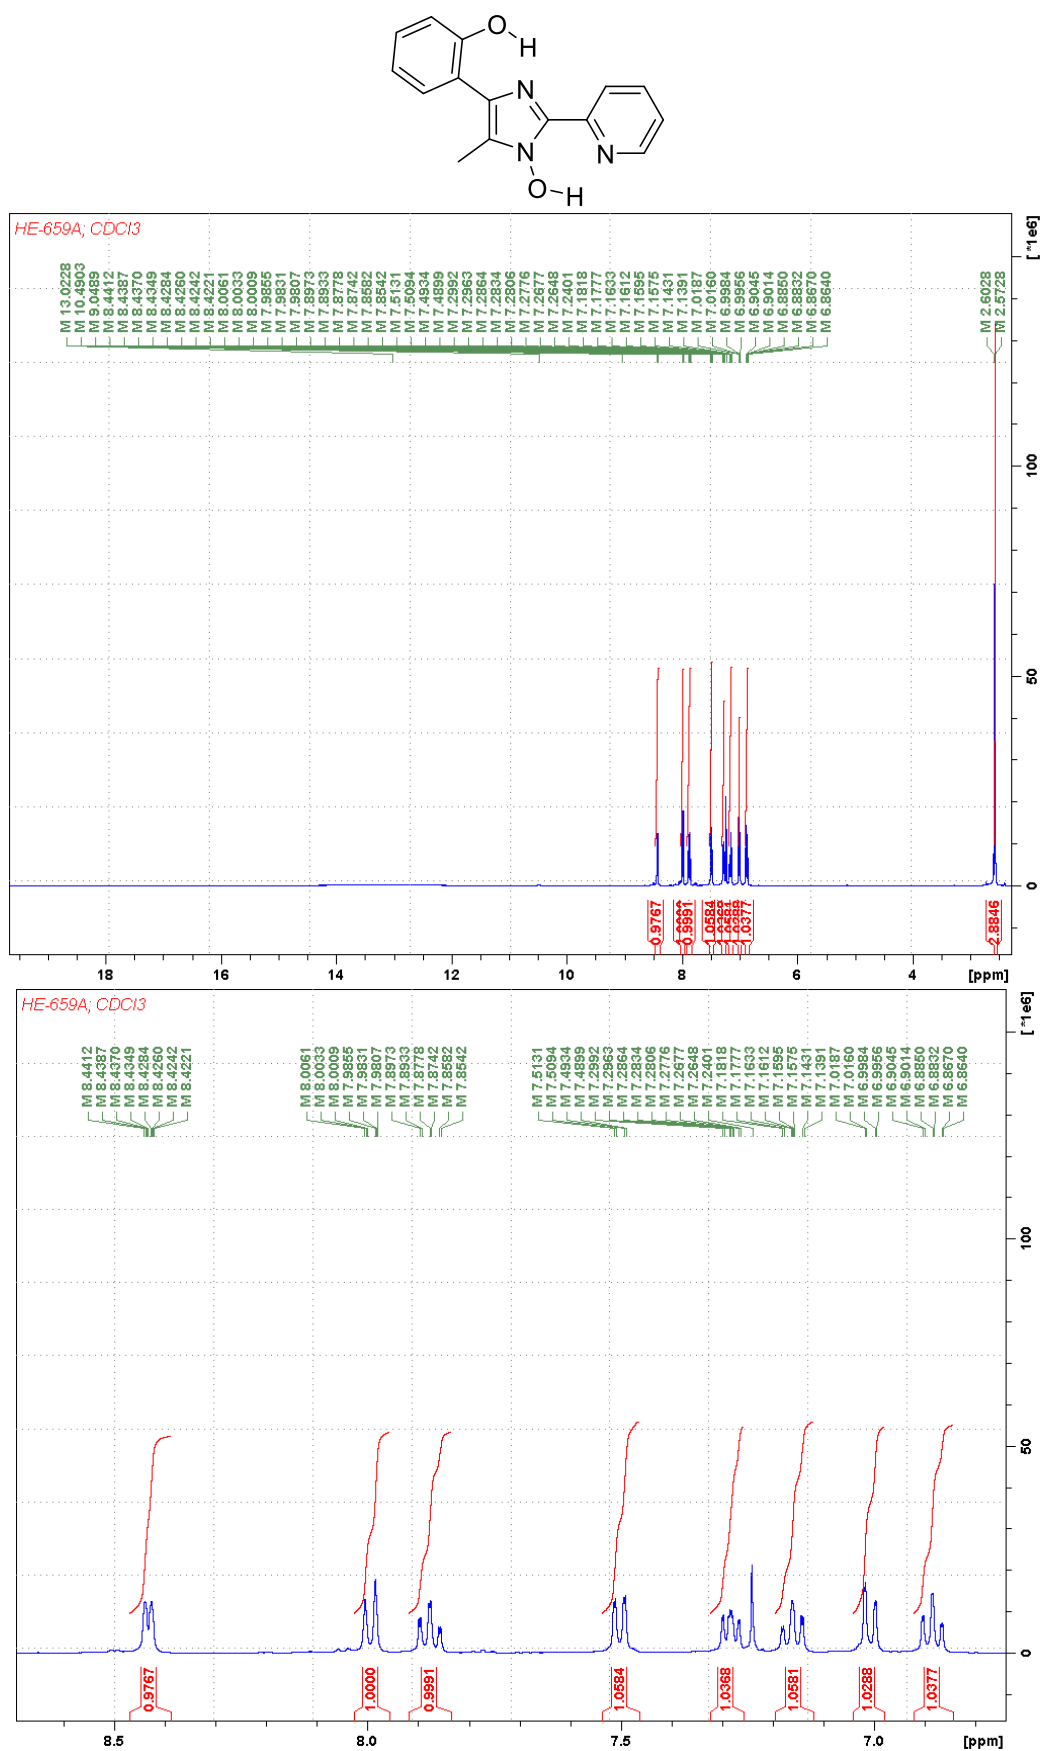

Figure S3. <sup>1</sup>H NMR spectrum of 1-hydroxy-4-(2-hydroxyphenyl)-5-methyl-2-(pyridin-2-yl)-1*H*-imidazole (in CDCl<sub>3</sub>).

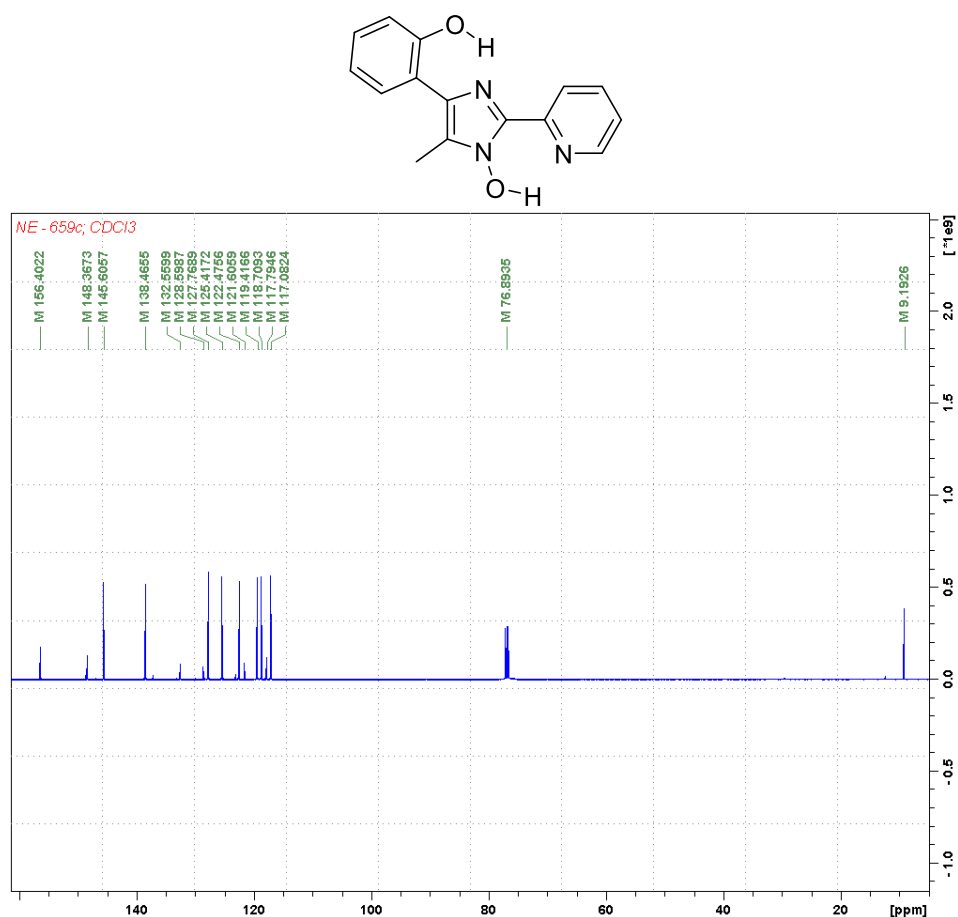

Figure S4. <sup>13</sup>C NMR spectrum of 1-hydroxy-4-(2-hydroxyphenyl)-5-methyl-2-(pyridin-2-yl)-1H-imidazole (in CDCl<sub>3</sub>).

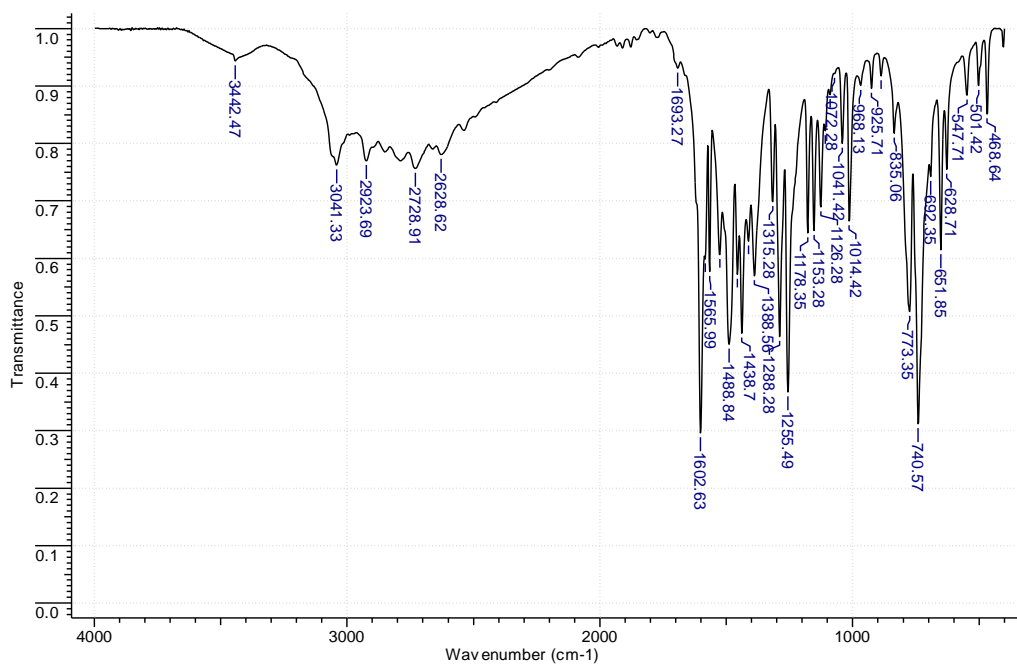

Figure S5. IR spectrum of 1-hydroxy-4-(2-hydroxyphenyl)-5-methyl-2-(pyridin-2-yl)-1H-imidazole (in KBr).

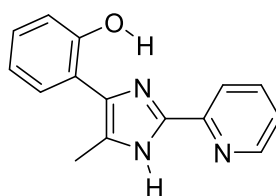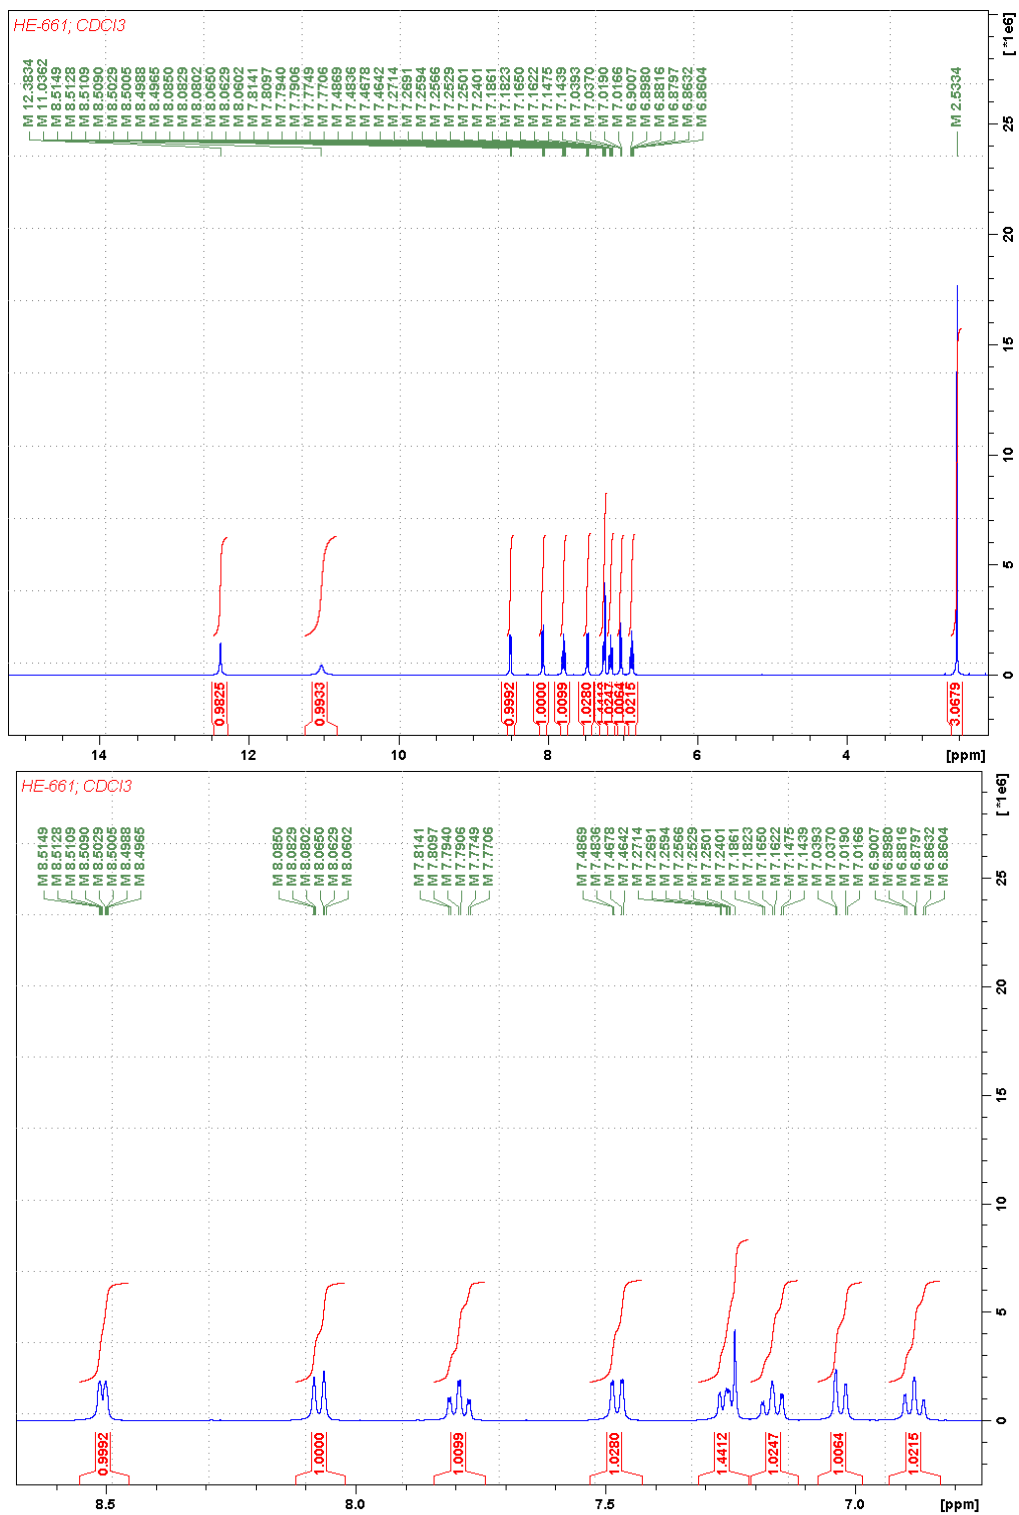

Figure S6.  $^1\text{H}$  NMR spectrum of 4-(2-hydroxyphenyl)-5-methyl-2-(pyridin-2-yl)-1*H*-imidazole (in  $\text{CDCl}_3$ ).

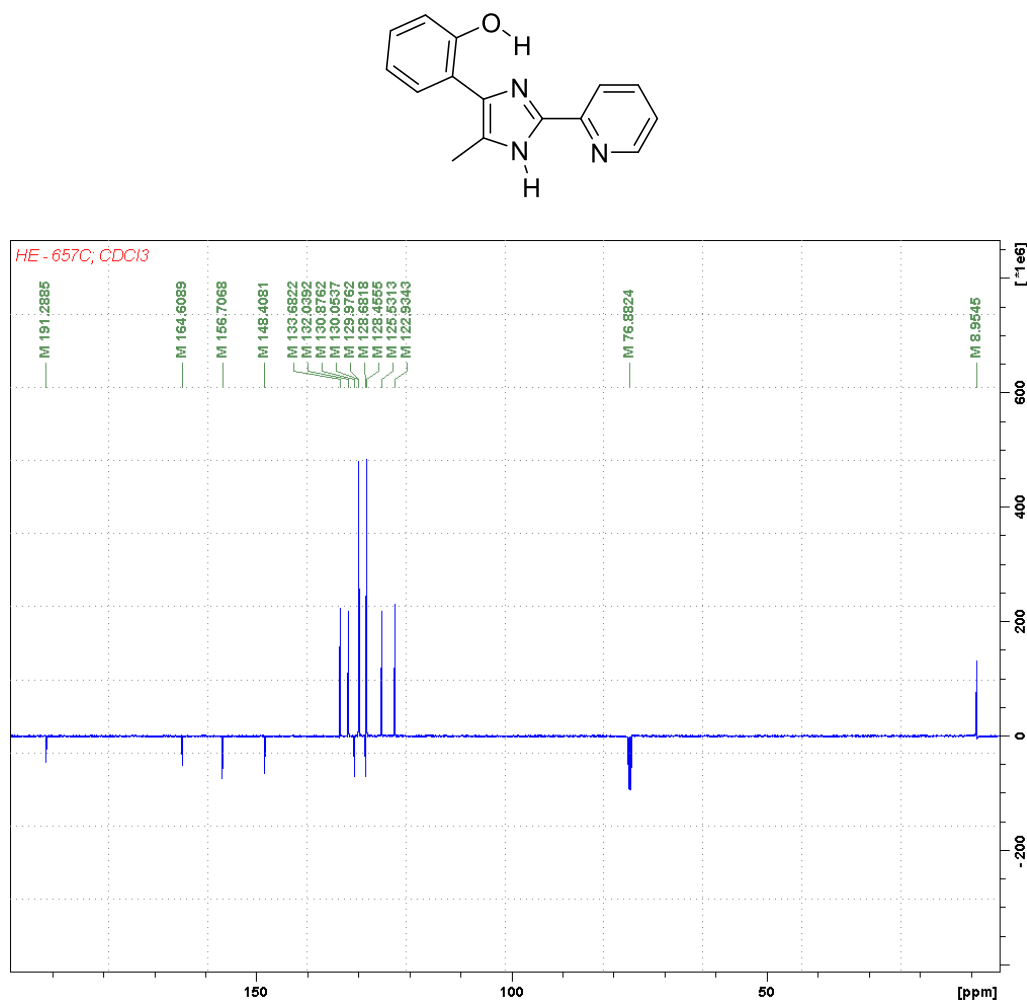

Figure S7. <sup>13</sup>C NMR spectrum of 1-(2-benzoyloxyphenyl)-2-(hydroxyimino)propan-1-one (in CDCl<sub>3</sub>).

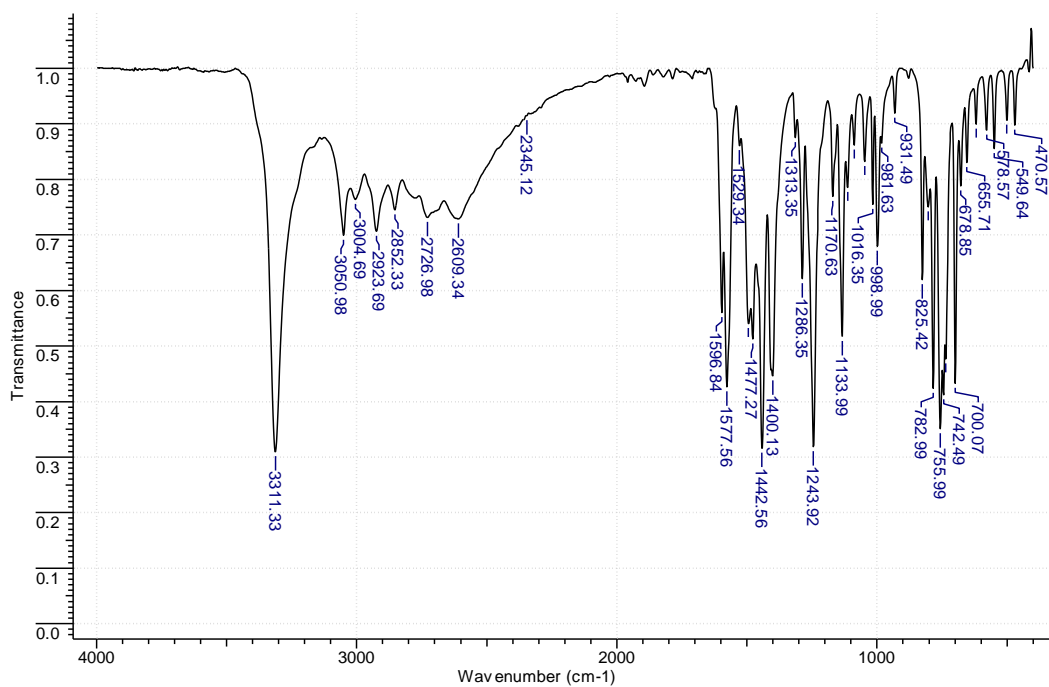

Figure S8. IR spectrum of 4-(2-hydroxyphenyl)-5-methyl-2-(pyridin-2-yl)-1H-imidazole (in KBr).

## Structural data

Table S1. Crystal data and structure refinement for  $\mathbf{L}^{\text{OH,OH}}$ .

| Identification code                         | $\mathbf{L}^{\text{OH,OH}}$                                      |
|---------------------------------------------|------------------------------------------------------------------|
| Empirical formula                           | $\text{C}_{15}\text{H}_{13}\text{N}_3\text{O}_2$                 |
| Formula weight                              | 267.28                                                           |
| Crystal system                              | <i>Monoclinic</i>                                                |
| Space group                                 | <i>P2<sub>1</sub>/c</i>                                          |
| <i>a</i> , Å                                | 13.0513(5)                                                       |
| <i>b</i> , Å                                | 7.2703(4)                                                        |
| <i>c</i> , Å                                | 27.5672(12)                                                      |
| $\beta$ , deg.                              | 90.491(4)                                                        |
| <i>V</i> , Å <sup>3</sup>                   | 2615.7(2)                                                        |
| <i>Z</i>                                    | 8                                                                |
| <i>D</i> (calc.), g/cm <sup>3</sup>         | 1.357                                                            |
| $\mu$ , mm <sup>-1</sup>                    | 0.093                                                            |
| <i>F</i> (000)                              | 1120                                                             |
| Crystal size, mm                            | 0.47 × 0.11 × 0.05                                               |
| $\theta$ range for data collection, deg.    | 2.14–29.13                                                       |
| Index ranges                                | $-16 \leq h \leq 17$ , $-9 \leq k \leq 9$ , $-25 \leq l \leq 36$ |
| Reflections collected / independent         | 13699 / 5878                                                     |
| <i>R</i> <sub>int</sub>                     | 0.0195                                                           |
| Reflections with $I > 2\sigma(I)$           | 3781                                                             |
| Goodness-of-fit on <i>F</i> <sup>2</sup>    | 1.040                                                            |
| Final <i>R</i> indices [ $I > 2\sigma(I)$ ] | <i>R</i> <sub>1</sub> = 0.0507, <i>wR</i> <sub>2</sub> = 0.1191  |
| <i>R</i> indices (all data)                 | <i>R</i> <sub>1</sub> = 0.0875, <i>wR</i> <sub>2</sub> = 0.1332  |
| Largest diff. peak / hole, e/Å <sup>3</sup> | 0.172 / -0.178                                                   |



Table S2. Bond lengths and angles for **L<sup>OH,OH</sup>**.

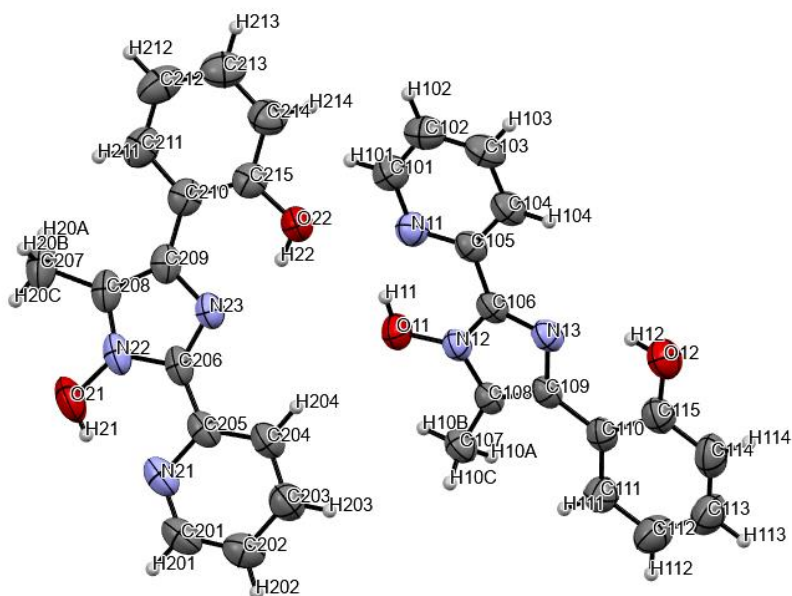

| Bond          | <i>d</i> , Å | Bond          | <i>d</i> , Å |
|---------------|--------------|---------------|--------------|
| O(11)-H(11)   | 0.8200       | O(21)-H(21)   | 0.8200       |
| O(11)-N(12)   | 1.3826(16)   | O(21)-N(22)   | 1.3832(18)   |
| O(12)-H(12)   | 0.8200       | O(22)-H(22)   | 0.8200       |
| O(12)-C(115)  | 1.355(2)     | O(22)-C(215)  | 1.3560(18)   |
| N(11)-C(101)  | 1.336(2)     | N(21)-C(201)  | 1.339(2)     |
| N(11)-C(105)  | 1.3475(19)   | N(21)-C(205)  | 1.349(2)     |
| N(12)-C(106)  | 1.3582(19)   | N(22)-C(206)  | 1.353(2)     |
| N(12)-C(108)  | 1.3556(19)   | N(22)-C(208)  | 1.353(2)     |
| N(13)-C(106)  | 1.3241(19)   | N(23)-C(206)  | 1.330(2)     |
| N(13)-C(109)  | 1.3802(19)   | N(23)-C(209)  | 1.376(2)     |
| C(101)-H(101) | 0.9300       | C(201)-H(201) | 0.9300       |
| C(101)-C(102) | 1.369(2)     | C(201)-C(202) | 1.370(3)     |
| C(102)-H(102) | 0.9300       | C(202)-H(202) | 0.9300       |
| C(102)-C(103) | 1.384(2)     | C(202)-C(203) | 1.376(3)     |
| C(103)-H(103) | 0.9300       | C(203)-H(203) | 0.9300       |
| C(103)-C(104) | 1.372(2)     | C(203)-C(204) | 1.374(2)     |
| C(104)-H(104) | 0.9300       | C(204)-H(204) | 0.9300       |
| C(104)-C(105) | 1.388(2)     | C(204)-C(205) | 1.388(2)     |
| C(105)-C(106) | 1.452(2)     | C(205)-C(206) | 1.455(2)     |
| C(107)-H(10A) | 0.9600       | C(207)-H(20A) | 0.9600       |
| C(107)-H(10B) | 0.9600       | C(207)-H(20B) | 0.9600       |

|                      |                 |                      |                 |
|----------------------|-----------------|----------------------|-----------------|
| C(107)-H(10C)        | 0.9600          | C(207)-H(20C)        | 0.9600          |
| C(107)-C(108)        | 1.485(2)        | C(207)-C(208)        | 1.490(2)        |
| C(108)-C(109)        | 1.393(2)        | C(208)-C(209)        | 1.393(2)        |
| C(109)-C(110)        | 1.464(2)        | C(209)-C(210)        | 1.466(2)        |
| C(110)-C(111)        | 1.389(2)        | C(210)-C(211)        | 1.396(2)        |
| C(110)-C(115)        | 1.407(2)        | C(210)-C(215)        | 1.412(2)        |
| C(111)-H(111)        | 0.9300          | C(211)-H(211)        | 0.9300          |
| C(111)-C(112)        | 1.380(2)        | C(211)-C(212)        | 1.376(3)        |
| C(112)-H(112)        | 0.9300          | C(212)-H(212)        | 0.9300          |
| C(112)-C(113)        | 1.368(3)        | C(212)-C(213)        | 1.375(3)        |
| C(113)-H(113)        | 0.9300          | C(213)-H(213)        | 0.9300          |
| C(113)-C(114)        | 1.367(3)        | C(213)-C(214)        | 1.370(3)        |
| C(114)-H(114)        | 0.9300          | C(214)-H(214)        | 0.9300          |
| C(114)-C(115)        | 1.399(3)        | C(214)-C(215)        | 1.385(2)        |
| Angle                | $\omega$ , deg. | Angle                | $\omega$ , deg. |
| N(12)-O(11)-H(11)    | 109.5           | N(22)-O(21)-H(21)    | 109.5           |
| C(115)-O(12)-H(12)   | 109.5           | C(215)-O(22)-H(22)   | 109.5           |
| C(101)-N(11)-C(105)  | 117.87(14)      | C(201)-N(21)-C(205)  | 118.01(16)      |
| C(106)-N(12)-O(11)   | 126.15(13)      | C(206)-N(22)-O(21)   | 125.28(15)      |
| C(108)-N(12)-O(11)   | 123.03(12)      | C(208)-N(22)-O(21)   | 123.53(14)      |
| C(108)-N(12)-C(106)  | 110.80(13)      | C(208)-N(22)-C(206)  | 111.19(14)      |
| C(106)-N(13)-C(109)  | 107.10(13)      | C(206)-N(23)-C(209)  | 106.83(13)      |
| N(11)-C(101)-H(101)  | 118.4           | N(21)-C(201)-H(201)  | 118.5           |
| N(11)-C(101)-C(102)  | 123.24(17)      | N(21)-C(201)-C(202)  | 122.94(17)      |
| C(102)-C(101)-H(101) | 118.4           | C(202)-C(201)-H(201) | 118.5           |
| C(101)-C(102)-H(102) | 120.7           | C(201)-C(202)-H(202) | 120.6           |
| C(101)-C(102)-C(103) | 118.64(16)      | C(201)-C(202)-C(203) | 118.72(18)      |
| C(103)-C(102)-H(102) | 120.7           | C(203)-C(202)-H(202) | 120.6           |
| C(102)-C(103)-H(103) | 120.3           | C(202)-C(203)-H(203) | 120.1           |
| C(104)-C(103)-C(102) | 119.31(16)      | C(204)-C(203)-C(202) | 119.74(18)      |
| C(104)-C(103)-H(103) | 120.3           | C(204)-C(203)-H(203) | 120.1           |
| C(103)-C(104)-H(104) | 120.6           | C(203)-C(204)-H(204) | 120.8           |
| C(103)-C(104)-C(105) | 118.74(16)      | C(203)-C(204)-C(205) | 118.46(16)      |
| C(105)-C(104)-H(104) | 120.6           | C(205)-C(204)-H(204) | 120.8           |
| N(11)-C(105)-C(104)  | 122.20(14)      | N(21)-C(205)-C(204)  | 122.12(16)      |
| N(11)-C(105)-C(106)  | 115.43(13)      | N(21)-C(205)-C(206)  | 115.43(15)      |
| C(104)-C(105)-C(106) | 122.37(15)      | C(204)-C(205)-C(206) | 122.44(14)      |
| N(12)-C(106)-C(105)  | 123.33(14)      | N(22)-C(206)-C(205)  | 123.20(14)      |

|                      |            |                      |            |
|----------------------|------------|----------------------|------------|
| N(13)-C(106)-N(12)   | 108.69(13) | N(23)-C(206)-N(22)   | 108.54(15) |
| N(13)-C(106)-C(105)  | 127.97(14) | N(23)-C(206)-C(205)  | 128.24(14) |
| H(10A)-C(107)-H(10B) | 109.5      | H(20A)-C(207)-H(20B) | 109.5      |
| H(10A)-C(107)-H(10C) | 109.5      | H(20A)-C(207)-H(20C) | 109.5      |
| H(10B)-C(107)-H(10C) | 109.5      | H(20B)-C(207)-H(20C) | 109.5      |
| C(108)-C(107)-H(10A) | 109.5      | C(208)-C(207)-H(20A) | 109.5      |
| C(108)-C(107)-H(10B) | 109.5      | C(208)-C(207)-H(20B) | 109.5      |
| C(108)-C(107)-H(10C) | 109.5      | C(208)-C(207)-H(20C) | 109.5      |
| N(12)-C(108)-C(107)  | 120.69(13) | N(22)-C(208)-C(207)  | 120.98(16) |
| N(12)-C(108)-C(109)  | 103.96(13) | N(22)-C(208)-C(209)  | 103.70(14) |
| C(109)-C(108)-C(107) | 135.32(14) | C(209)-C(208)-C(207) | 135.31(18) |
| N(13)-C(109)-C(108)  | 109.45(13) | N(23)-C(209)-C(208)  | 109.74(15) |
| N(13)-C(109)-C(110)  | 120.08(14) | N(23)-C(209)-C(210)  | 120.26(14) |
| C(108)-C(109)-C(110) | 130.47(14) | C(208)-C(209)-C(210) | 130.00(15) |
| C(111)-C(110)-C(109) | 122.45(15) | C(211)-C(210)-C(209) | 122.72(17) |
| C(111)-C(110)-C(115) | 116.60(15) | C(211)-C(210)-C(215) | 116.64(16) |
| C(115)-C(110)-C(109) | 120.95(15) | C(215)-C(210)-C(209) | 120.63(14) |
| C(110)-C(111)-H(111) | 118.6      | C(210)-C(211)-H(211) | 118.9      |
| C(112)-C(111)-C(110) | 122.79(18) | C(212)-C(211)-C(210) | 122.3(2)   |
| C(112)-C(111)-H(111) | 118.6      | C(212)-C(211)-H(211) | 118.9      |
| C(111)-C(112)-H(112) | 120.2      | C(211)-C(212)-H(212) | 120.0      |
| C(113)-C(112)-C(111) | 119.6(2)   | C(213)-C(212)-C(211) | 120.03(18) |
| C(113)-C(112)-H(112) | 120.2      | C(213)-C(212)-H(212) | 120.0      |
| C(112)-C(113)-H(113) | 120.0      | C(212)-C(213)-H(213) | 120.3      |
| C(114)-C(113)-C(112) | 120.01(18) | C(214)-C(213)-C(212) | 119.34(19) |
| C(114)-C(113)-H(113) | 120.0      | C(214)-C(213)-H(213) | 120.3      |
| C(113)-C(114)-H(114) | 119.6      | C(213)-C(214)-H(214) | 119.3      |
| C(113)-C(114)-C(115) | 120.80(19) | C(213)-C(214)-C(215) | 121.42(19) |
| C(115)-C(114)-H(114) | 119.6      | C(215)-C(214)-H(214) | 119.3      |
| O(12)-C(115)-C(110)  | 122.19(16) | O(22)-C(215)-C(210)  | 122.54(15) |
| O(12)-C(115)-C(114)  | 117.59(17) | O(22)-C(215)-C(214)  | 117.30(16) |
| C(114)-C(115)-C(110) | 120.21(18) | C(214)-C(215)-C(210) | 120.16(16) |

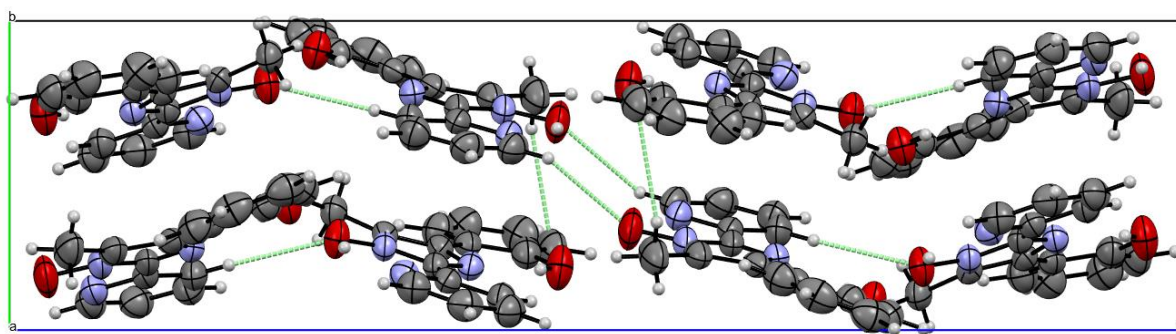

Figure S9. Packing of  $L^{OH,OH}$  (view along the *a* axis).

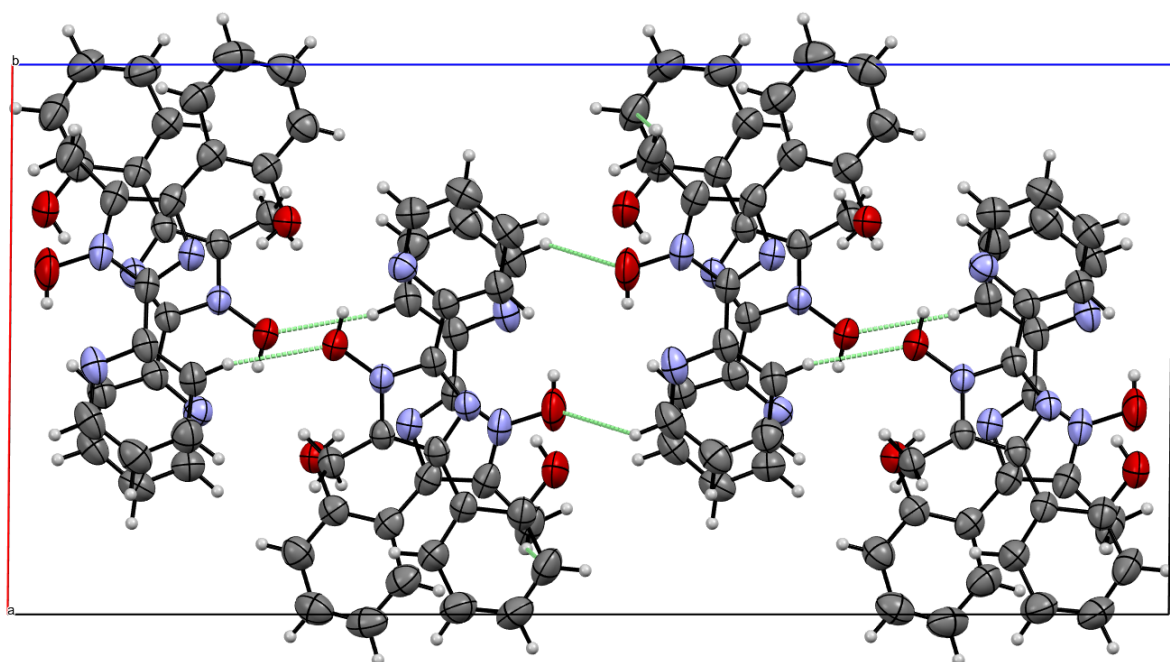

Figure S10. Packing of  $L^{OH,OH}$  (view along the *b* axis).

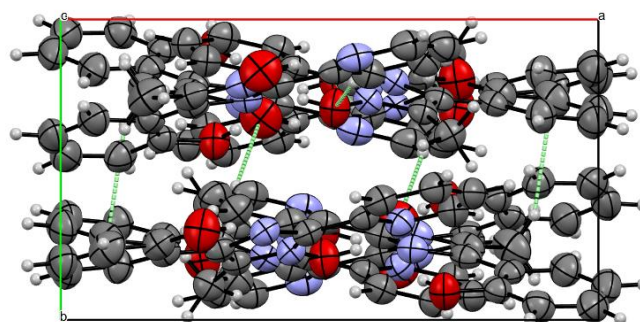

Figure S11. Packing of  $L^{OH,OH}$  (view along the *c* axis).

## Photophysical data

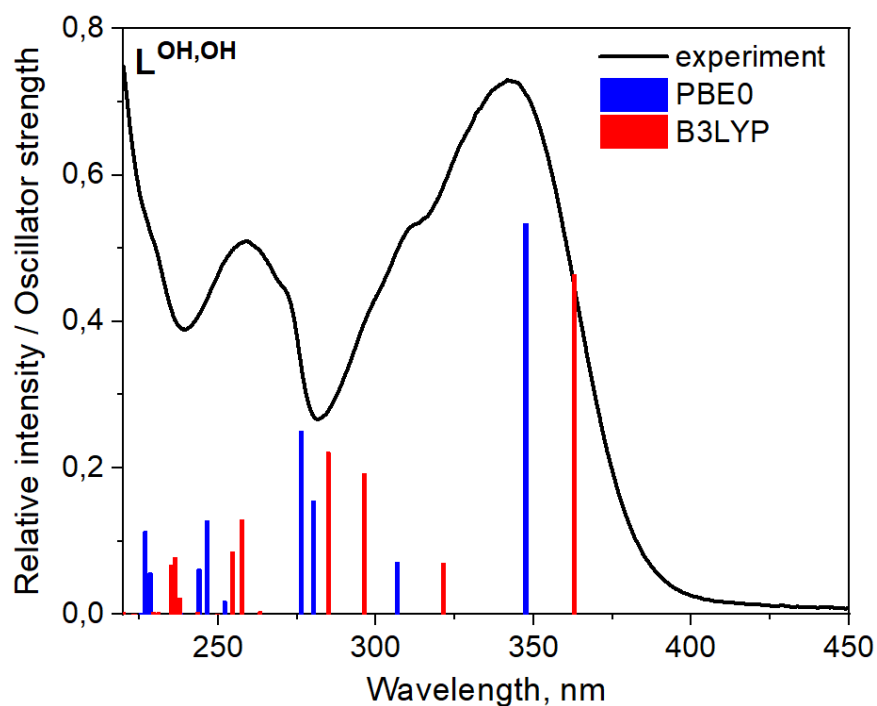

Figure S12. Comparison of the experimental absorption spectrum of  $L^{OH,OH}$  with those computed using PBE0 and B3LYP functionals.

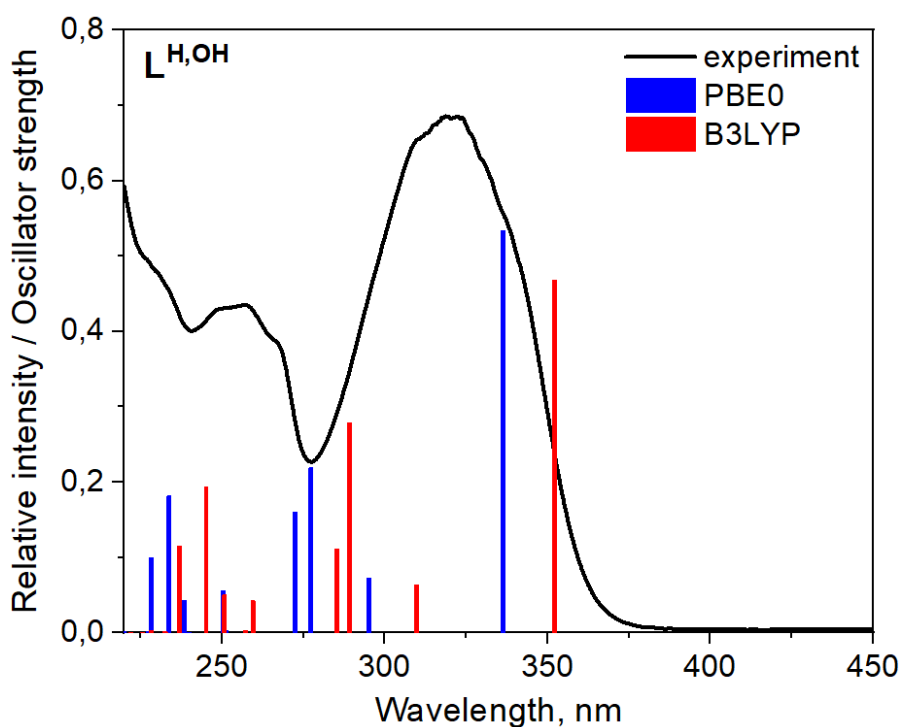

Figure S13. Comparison of the experimental absorption spectrum of  $L^{H,OH}$  with those computed using PBE0 and B3LYP functionals.

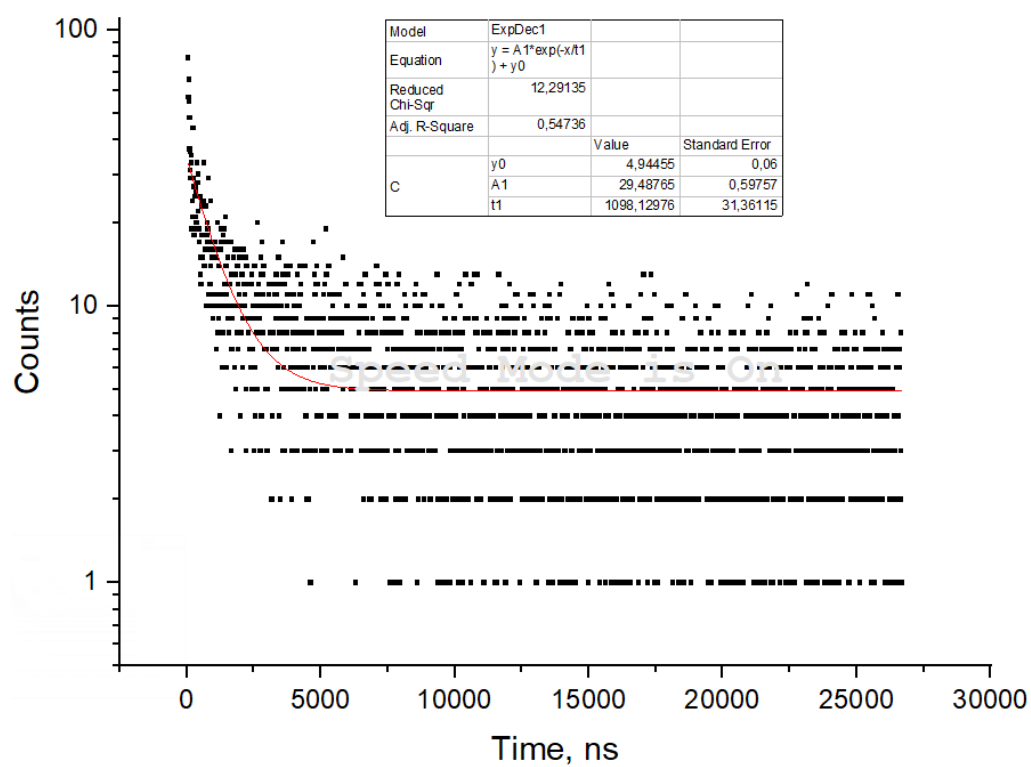

Figure S14. Photoluminescence decay curve for  $L^{H,OH}$ .

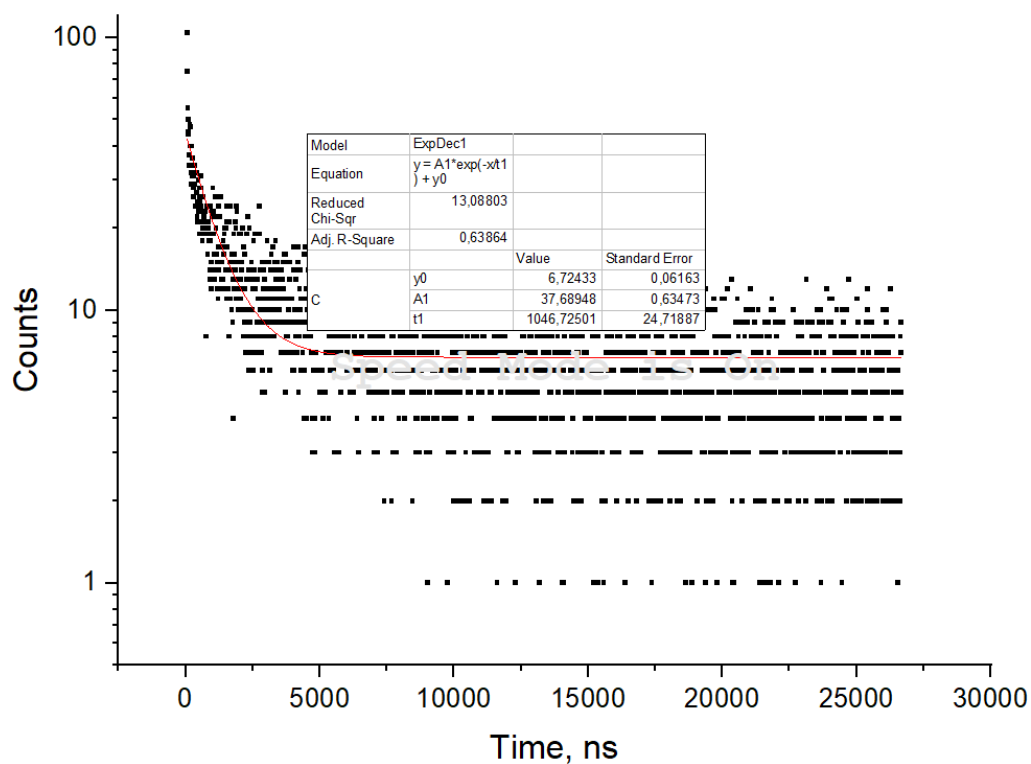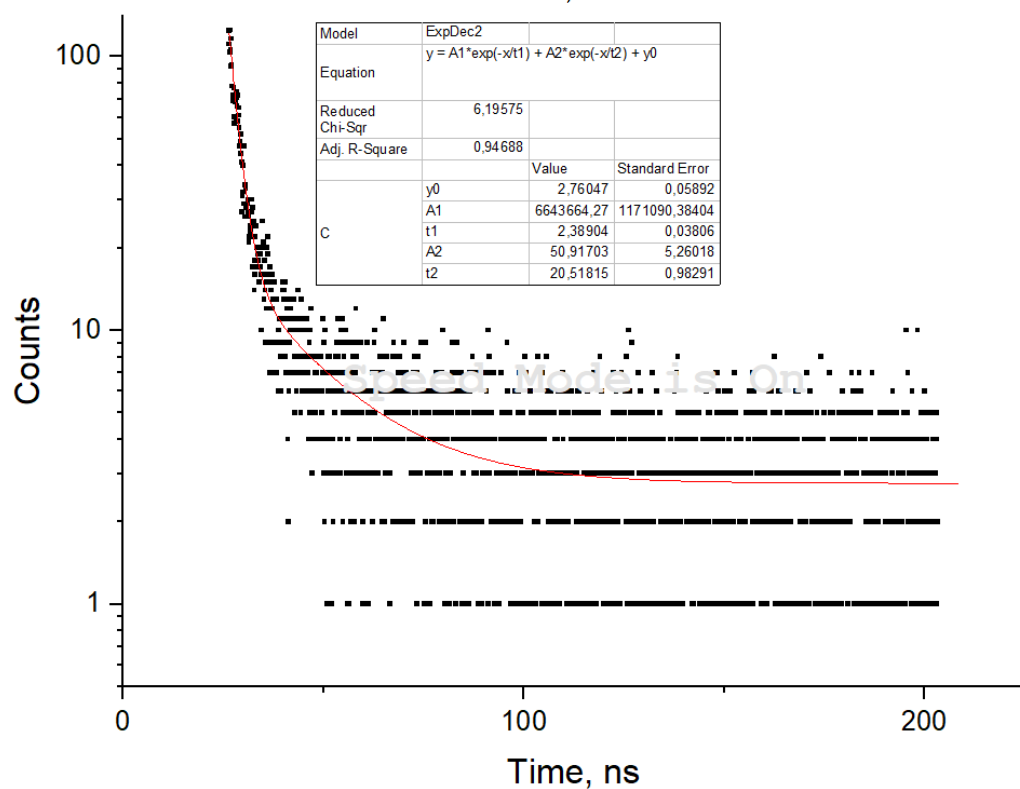

Figure S15. Photoluminescence decay curves for  $L^{OH,OH}$ .

## Theoretical data

**Table S3.** Optimized geometry of the **S<sub>0</sub> state** of **L<sup>H,OH</sup> (N-L<sup>H,OH</sup> form, S<sub>0</sub><sup>N</sup>)** in Cartesian (XYZ) coordinates as calculated in Gaussian at the PBE0/6-31+g(d) level of theory in **MeCN continuum solvation model**.

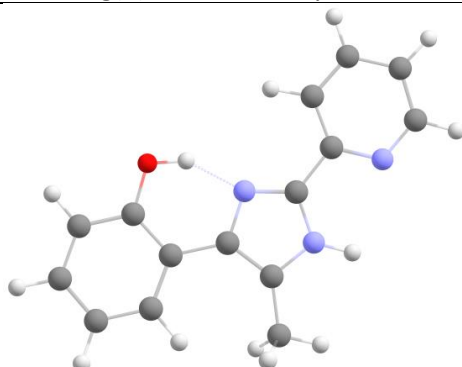

|   |                 |                 |                 |
|---|-----------------|-----------------|-----------------|
| N | 0.154602000000  | -0.327532000000 | -0.028976000000 |
| C | 1.253141000000  | 0.405811000000  | -0.006470000000 |
| C | -0.915083000000 | 0.542549000000  | -0.008188000000 |
| H | -3.245774000000 | 1.944987000000  | -0.190102000000 |
| C | -0.434023000000 | 1.850876000000  | 0.032257000000  |
| N | 0.926463000000  | 1.718995000000  | 0.028119000000  |
| H | 1.609212000000  | 2.466225000000  | 0.053500000000  |
| C | 2.633622000000  | -0.059486000000 | -0.014297000000 |
| H | 4.547823000000  | -2.851404000000 | -0.084168000000 |
| N | 3.571391000000  | 0.901203000000  | 0.016135000000  |
| C | 2.938141000000  | -1.423891000000 | -0.051148000000 |
| C | 4.849301000000  | 0.521111000000  | 0.010809000000  |
| C | 4.274952000000  | -1.800236000000 | -0.055962000000 |
| C | 5.256380000000  | -0.811286000000 | -0.024336000000 |
| H | 2.140521000000  | -2.159136000000 | -0.075614000000 |
| H | 5.585437000000  | 1.322031000000  | 0.035892000000  |
| H | 6.312595000000  | -1.061331000000 | -0.026896000000 |
| C | -1.081068000000 | 3.189899000000  | 0.082401000000  |
| H | -1.629570000000 | 3.411173000000  | -0.840505000000 |
| H | -1.787067000000 | 3.261683000000  | 0.916733000000  |
| C | -3.399414000000 | 0.874878000000  | -0.111578000000 |
| H | -0.329912000000 | 3.973619000000  | 0.215761000000  |
| C | -2.284190000000 | 0.024979000000  | -0.022201000000 |
| C | -2.528103000000 | -1.370332000000 | 0.054486000000  |
| C | -3.838991000000 | -1.856201000000 | 0.057355000000  |
| C | -4.701113000000 | 0.387806000000  | -0.110816000000 |
| C | -4.920399000000 | -0.987815000000 | -0.022611000000 |
| H | -3.985186000000 | -2.931279000000 | 0.120969000000  |
| H | -5.536758000000 | 1.078240000000  | -0.181759000000 |
| H | -5.932016000000 | -1.385382000000 | -0.020359000000 |
| O | -1.533485000000 | -2.282397000000 | 0.129114000000  |
| H | -0.667542000000 | -1.790889000000 | 0.078495000000  |



Table S4. Optimized geometry of the **S<sub>0</sub> state** of **L<sup>H,OH</sup> (*N*-L<sup>H,OH</sup> form, S<sub>0</sub><sup>N</sup>)** in Cartesian (XYZ) coordinates as calculated in Gaussian at the PBE0/6-31+g(d) level of theory **in the gas phase**.

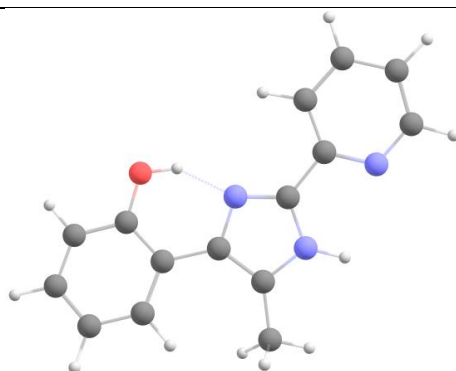

|   |                 |                 |                 |
|---|-----------------|-----------------|-----------------|
| N | -1.142467000000 | 0.307306000000  | -3.002752000000 |
| C | -0.095718000000 | 1.078464000000  | -3.228272000000 |
| C | -0.660009000000 | -0.916686000000 | -2.594297000000 |
| H | -0.130111000000 | -3.196620000000 | -1.213189000000 |
| C | 0.732962000000  | -0.877168000000 | -2.586888000000 |
| N | 1.047133000000  | 0.395175000000  | -2.980663000000 |
| H | 1.966744000000  | 0.799897000000  | -3.097824000000 |
| C | -0.083507000000 | 2.461675000000  | -3.678776000000 |
| H | -2.090108000000 | 5.044062000000  | -4.551231000000 |
| N | 1.132364000000  | 3.007783000000  | -3.838765000000 |
| C | -1.272680000000 | 3.156700000000  | -3.922139000000 |
| C | 1.193839000000  | 4.272333000000  | -4.251182000000 |
| C | -1.187071000000 | 4.473174000000  | -4.352051000000 |
| C | 0.070225000000  | 5.049944000000  | -4.522851000000 |
| H | -2.226429000000 | 2.662108000000  | -3.770229000000 |
| H | 2.193972000000  | 4.684960000000  | -4.370786000000 |
| H | 0.181613000000  | 6.076845000000  | -4.857264000000 |
| C | 1.787827000000  | -1.883834000000 | -2.291704000000 |
| H | 1.935040000000  | -2.028778000000 | -1.213863000000 |
| H | 1.531700000000  | -2.855532000000 | -2.725903000000 |
| C | -1.151391000000 | -3.150704000000 | -1.576822000000 |
| H | 2.748323000000  | -1.573264000000 | -2.716665000000 |
| C | -1.576949000000 | -2.010943000000 | -2.277034000000 |
| C | -2.934975000000 | -1.948447000000 | -2.676772000000 |
| C | -3.789486000000 | -3.023466000000 | -2.414214000000 |
| C | -2.005755000000 | -4.212178000000 | -1.310536000000 |
| C | -3.331214000000 | -4.147608000000 | -1.742721000000 |
| H | -4.820659000000 | -2.942552000000 | -2.745830000000 |
| H | -1.643179000000 | -5.077716000000 | -0.763388000000 |
| H | -4.013252000000 | -4.970498000000 | -1.544268000000 |
| O | -3.461319000000 | -0.887219000000 | -3.316239000000 |
| H | -2.775260000000 | -0.175472000000 | -3.342017000000 |

Table S5. Optimized geometry of the **T<sub>1</sub> state** of **L<sup>H,OH</sup> (N-L<sup>H,OH</sup> form, T<sub>1</sub><sup>N</sup>)** in Cartesian (XYZ) coordinates as calculated in Gaussian at the PBE0/6-31+g(d) level of theory **in the gas phase**.

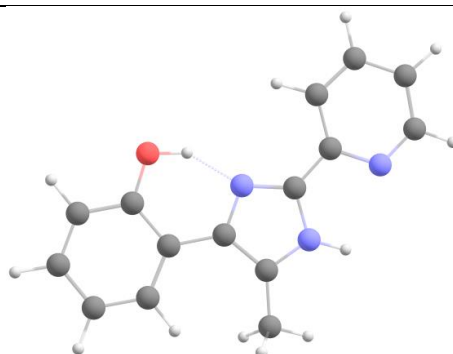

|   |                 |                 |                 |
|---|-----------------|-----------------|-----------------|
| N | 0.121619000000  | -0.075677000000 | -4.090932000000 |
| C | 0.159237000000  | 1.067937000000  | -3.334976000000 |
| C | -0.041392000000 | -1.109837000000 | -3.244828000000 |
| H | -0.617868000000 | -3.401353000000 | -1.867887000000 |
| C | -0.102466000000 | -0.639018000000 | -1.888385000000 |
| N | 0.006758000000  | 0.712238000000  | -1.986757000000 |
| H | 0.039149000000  | 1.405617000000  | -1.252261000000 |
| C | 0.316888000000  | 2.382376000000  | -3.722694000000 |
| H | 0.740463000000  | 4.435919000000  | -6.415873000000 |
| N | 0.315942000000  | 3.307876000000  | -2.678945000000 |
| C | 0.471860000000  | 2.777280000000  | -5.096195000000 |
| C | 0.464097000000  | 4.571545000000  | -3.010104000000 |
| C | 0.621965000000  | 4.106060000000  | -5.387231000000 |
| C | 0.620978000000  | 5.047624000000  | -4.327900000000 |
| H | 0.464501000000  | 2.016553000000  | -5.870761000000 |
| H | 0.461875000000  | 5.282053000000  | -2.182688000000 |
| H | 0.737408000000  | 6.110337000000  | -4.513446000000 |
| C | -0.231482000000 | -1.312738000000 | -0.573799000000 |
| H | -1.231071000000 | -1.744147000000 | -0.429109000000 |
| H | 0.498831000000  | -2.121753000000 | -0.460770000000 |
| C | -0.406574000000 | -3.566353000000 | -2.917531000000 |
| H | -0.062714000000 | -0.596468000000 | 0.236040000000  |
| C | -0.110172000000 | -2.463111000000 | -3.745481000000 |
| C | 0.120324000000  | -2.709846000000 | -5.133157000000 |
| C | 0.080246000000  | -4.025323000000 | -5.619607000000 |
| C | -0.451478000000 | -4.855238000000 | -3.411253000000 |
| C | -0.199812000000 | -5.081040000000 | -4.772857000000 |
| H | 0.268450000000  | -4.178005000000 | -6.677932000000 |
| H | -0.685559000000 | -5.684346000000 | -2.750359000000 |
| H | -0.230990000000 | -6.092515000000 | -5.169633000000 |
| O | 0.380361000000  | -1.740483000000 | -6.004857000000 |
| H | 0.341290000000  | -0.864759000000 | -5.510884000000 |

Table S6. Optimized geometry of the **T<sub>1</sub> state** of **L<sup>H,OH</sup>** (**T-L<sup>H,OH</sup> form, T<sub>1</sub>T**) in Cartesian (XYZ) coordinates as calculated in Gaussian at the PBE0/6-31+g(d) level of theory **in the gas phase**.

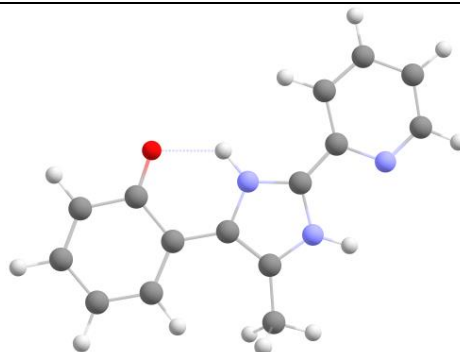

|   |                 |                 |                 |
|---|-----------------|-----------------|-----------------|
| N | -0.104130000000 | -0.077890000000 | -4.090866000000 |
| C | -0.045145000000 | 1.085772000000  | -3.378701000000 |
| C | -0.051182000000 | -1.177881000000 | -3.242785000000 |
| H | -0.152065000000 | -3.490643000000 | -1.812554000000 |
| C | 0.035913000000  | -0.674144000000 | -1.943495000000 |
| N | 0.027142000000  | 0.689167000000  | -2.050695000000 |
| H | 0.097541000000  | 1.382365000000  | -1.318361000000 |
| C | -0.050015000000 | 2.421273000000  | -3.771174000000 |
| H | -0.181794000000 | 4.545819000000  | -6.427138000000 |
| N | 0.028705000000  | 3.318084000000  | -2.724940000000 |
| C | -0.127849000000 | 2.847286000000  | -5.131339000000 |
| C | 0.030262000000  | 4.604662000000  | -3.032574000000 |
| C | -0.123134000000 | 4.194586000000  | -5.400000000000 |
| C | -0.042063000000 | 5.115238000000  | -4.334165000000 |
| H | -0.190676000000 | 2.117986000000  | -5.935152000000 |
| H | 0.093613000000  | 5.289333000000  | -2.186404000000 |
| H | -0.035708000000 | 6.186356000000  | -4.507088000000 |
| C | 0.132565000000  | -1.329396000000 | -0.614164000000 |
| H | -0.787977000000 | -1.867095000000 | -0.355514000000 |
| H | 0.961885000000  | -2.044335000000 | -0.576260000000 |
| C | -0.120418000000 | -3.634474000000 | -2.885846000000 |
| H | 0.305835000000  | -0.579259000000 | 0.163050000000  |
| C | -0.081319000000 | -2.513629000000 | -3.741813000000 |
| C | -0.078369000000 | -2.746784000000 | -5.197658000000 |
| C | -0.087713000000 | -4.118785000000 | -5.651276000000 |
| C | -0.133208000000 | -4.923313000000 | -3.377712000000 |
| C | -0.112827000000 | -5.166012000000 | -4.775191000000 |
| H | -0.078982000000 | -4.264719000000 | -6.727353000000 |
| H | -0.166206000000 | -5.760270000000 | -2.685903000000 |
| H | -0.122509000000 | -6.189231000000 | -5.142102000000 |
| O | -0.066338000000 | -1.809323000000 | -6.033846000000 |
| H | -0.105602000000 | -0.224226000000 | -5.098116000000 |

Table S7. Optimized geometry of  $L^{H,OH}$  near  $S_0/S_1$  conical intersection in Cartesian (XYZ) coordinates as calculated in Gaussian at the PBE0/6-31+g(d) level of theory **in the gas phase**.

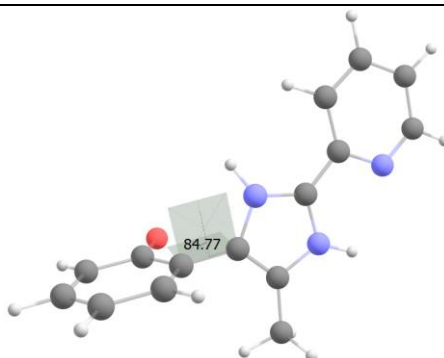

|   |                 |                 |                 |
|---|-----------------|-----------------|-----------------|
| N | -0.305971000000 | -0.037272000000 | -4.019431000000 |
| C | -0.071671000000 | 1.114771000000  | -3.314699000000 |
| C | 0.076517000000  | -1.120526000000 | -3.219580000000 |
| H | -1.986216000000 | -2.800214000000 | -2.880325000000 |
| C | 0.459618000000  | -0.655260000000 | -2.021128000000 |
| N | 0.352022000000  | 0.729339000000  | -2.082550000000 |
| H | 0.573797000000  | 1.403536000000  | -1.364503000000 |
| C | -0.242016000000 | 2.457670000000  | -3.703776000000 |
| H | -1.176723000000 | 4.526003000000  | -6.232906000000 |
| N | 0.100622000000  | 3.367200000000  | -2.731070000000 |
| C | -0.714414000000 | 2.853897000000  | -4.985635000000 |
| C | -0.009404000000 | 4.647960000000  | -3.041397000000 |
| C | -0.814457000000 | 4.196688000000  | -5.262723000000 |
| C | -0.450552000000 | 5.136600000000  | -4.277076000000 |
| H | -1.001135000000 | 2.116144000000  | -5.731113000000 |
| H | 0.269113000000  | 5.345396000000  | -2.251263000000 |
| H | -0.512119000000 | 6.203868000000  | -4.459404000000 |
| C | 0.908637000000  | -1.351594000000 | -0.793244000000 |
| H | 0.216408000000  | -1.198009000000 | 0.044593000000  |
| H | 0.974015000000  | -2.424661000000 | -0.981300000000 |
| C | -1.182407000000 | -3.243766000000 | -3.465413000000 |
| H | 1.900819000000  | -0.998287000000 | -0.484289000000 |
| C | -0.053145000000 | -2.510757000000 | -3.705078000000 |
| C | 1.010747000000  | -3.071693000000 | -4.514602000000 |
| C | 0.839161000000  | -4.414461000000 | -5.015558000000 |
| C | -1.315189000000 | -4.563139000000 | -3.957979000000 |
| C | -0.296498000000 | -5.139781000000 | -4.725438000000 |
| H | 1.659559000000  | -4.828934000000 | -5.594156000000 |
| H | -2.221612000000 | -5.123349000000 | -3.753289000000 |
| H | -0.410266000000 | -6.155281000000 | -5.094919000000 |
| O | 2.031076000000  | -2.401948000000 | -4.782716000000 |
| H | -0.220109000000 | -0.049955000000 | -5.013214000000 |

Table S8. Optimized geometry of the  $S_0$  state of  $L^{OH,OH}$  ( $N,N$ - $L^{H,OH}$  form,  $S_0^{N,N}$ ) in Cartesian (XYZ) coordinates as calculated in Gaussian at the PBE0/6-31+g(d) level of theory in MeCN continuum solvation model.

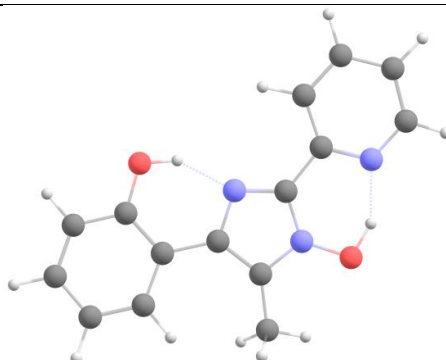

|   |                 |                 |                 |
|---|-----------------|-----------------|-----------------|
| N | -0.170318000000 | -0.049413000000 | -4.064017000000 |
| C | -0.084930000000 | 1.054424000000  | -3.331537000000 |
| C | -0.066182000000 | -1.115928000000 | -3.211206000000 |
| C | 0.098176000000  | -0.652883000000 | -1.900436000000 |
| C | 0.304502000000  | -1.301095000000 | -0.580403000000 |
| N | 0.071327000000  | 0.701741000000  | -2.027446000000 |
| C | -0.136888000000 | 2.431619000000  | -3.780158000000 |
| N | -0.009692000000 | 3.363480000000  | -2.815837000000 |
| C | -0.306413000000 | 2.768949000000  | -5.126816000000 |
| C | -0.046101000000 | 4.653554000000  | -3.154393000000 |
| C | -0.341765000000 | 4.113502000000  | -5.466565000000 |
| C | -0.209651000000 | 5.079320000000  | -4.467172000000 |
| H | -0.407013000000 | 1.987814000000  | -5.872654000000 |
| H | 0.060664000000  | 5.364747000000  | -2.339723000000 |
| H | -0.471746000000 | 4.409520000000  | -6.503515000000 |
| H | -0.232924000000 | 6.138987000000  | -4.698454000000 |
| H | -0.623311000000 | -1.734233000000 | -0.187884000000 |
| H | 1.047379000000  | -2.101524000000 | -0.651051000000 |
| H | 0.662105000000  | -0.566034000000 | 0.144878000000  |
| C | -0.112358000000 | -2.483649000000 | -3.727076000000 |
| C | -0.019986000000 | -2.728746000000 | -5.120395000000 |
| C | -0.247175000000 | -3.593468000000 | -2.876878000000 |
| C | -0.027819000000 | -4.039458000000 | -5.605193000000 |
| C | -0.260436000000 | -4.895487000000 | -3.363048000000 |
| C | -0.142795000000 | -5.117616000000 | -4.736095000000 |
| H | -0.358967000000 | -3.432982000000 | -1.810221000000 |
| H | 0.052415000000  | -4.188968000000 | -6.678673000000 |
| H | -0.367580000000 | -5.729031000000 | -2.674812000000 |
| O | 0.080924000000  | -1.733308000000 | -6.029553000000 |
| H | -0.004159000000 | -0.869329000000 | -5.544356000000 |
| O | 0.193620000000  | 1.554501000000  | -0.975316000000 |
| H | 0.153327000000  | 2.463401000000  | -1.434090000000 |
| H | -0.150331000000 | -6.129724000000 | -5.132292000000 |

Table S9. Optimized geometry of the  $S_0$  state of  $L^{OH,OH}$  ( $N,N$ - $L^{H,OH}$  form,  $S_0^{N,N}$ ) in Cartesian (XYZ) coordinates as calculated in Gaussian at the PBE0/6-31+g(d) level of theory in the gas phase.

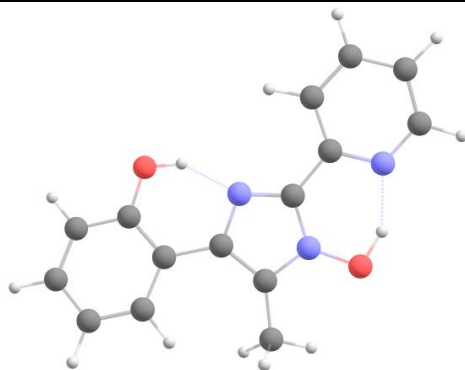

|   |                 |                 |                 |
|---|-----------------|-----------------|-----------------|
| N | -0.187803000000 | -0.038195000000 | -4.061322000000 |
| C | -0.091463000000 | 1.060320000000  | -3.320704000000 |
| C | -0.078752000000 | -1.108653000000 | -3.219575000000 |
| C | 0.103706000000  | -0.653749000000 | -1.905901000000 |
| C | 0.338835000000  | -1.311852000000 | -0.596010000000 |
| N | 0.078419000000  | 0.699984000000  | -2.019875000000 |
| C | -0.146468000000 | 2.434467000000  | -3.765019000000 |
| N | 0.000660000000  | 3.374959000000  | -2.811162000000 |
| C | -0.341208000000 | 2.763985000000  | -5.113005000000 |
| C | -0.039988000000 | 4.660634000000  | -3.163572000000 |
| C | -0.379379000000 | 4.103175000000  | -5.463302000000 |
| C | -0.226119000000 | 5.078478000000  | -4.474700000000 |
| H | -0.459624000000 | 1.972070000000  | -5.844698000000 |
| H | 0.083147000000  | 5.378970000000  | -2.356515000000 |
| H | -0.528740000000 | 4.390516000000  | -6.500592000000 |
| H | -0.251069000000 | 6.136606000000  | -4.714169000000 |
| H | -0.589523000000 | -1.698462000000 | -0.157152000000 |
| H | 1.034625000000  | -2.149274000000 | -0.706040000000 |
| H | 0.765903000000  | -0.594640000000 | 0.110034000000  |
| C | -0.126756000000 | -2.475893000000 | -3.733975000000 |
| C | 0.026194000000  | -2.726376000000 | -5.120154000000 |
| C | -0.319044000000 | -3.577069000000 | -2.884960000000 |
| C | 0.030598000000  | -4.040903000000 | -5.595330000000 |
| C | -0.323862000000 | -4.880475000000 | -3.362731000000 |
| C | -0.137904000000 | -5.109704000000 | -4.726874000000 |
| H | -0.489441000000 | -3.405013000000 | -1.827368000000 |
| H | 0.161311000000  | -4.192976000000 | -6.662861000000 |
| H | -0.478698000000 | -5.709475000000 | -2.678129000000 |
| O | 0.175920000000  | -1.743039000000 | -6.027743000000 |
| H | 0.061244000000  | -0.879164000000 | -5.561972000000 |
| O | 0.216478000000  | 1.540060000000  | -0.959233000000 |
| H | 0.181323000000  | 2.447728000000  | -1.400853000000 |
| H | -0.136622000000 | -6.124357000000 | -5.116926000000 |

Table S10. Optimized geometry of the **S<sub>0</sub> state** of **L<sup>OH,OH</sup>** (**T,N-L<sup>H,OH</sup>** form, **S<sub>0</sub><sup>T,N</sup>**) in Cartesian (XYZ) coordinates as calculated in Gaussian at the PBE0/6-31+g(d) level of theory in the gas phase.

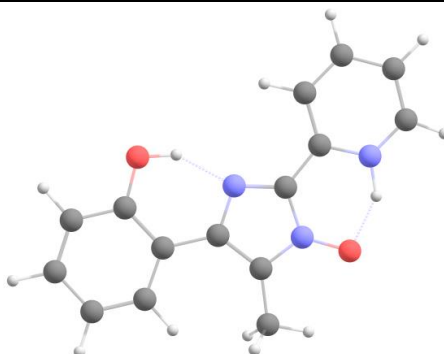

|   |                 |                 |                 |
|---|-----------------|-----------------|-----------------|
| N | -0.004844000000 | -0.517430000000 | -0.005024000000 |
| C | 1.142560000000  | 0.179694000000  | -0.001537000000 |
| C | -1.006920000000 | 0.389319000000  | -0.002891000000 |
| C | -0.464287000000 | 1.703048000000  | 0.002722000000  |
| C | -1.032469000000 | 3.072657000000  | 0.011401000000  |
| N | 0.877241000000  | 1.532694000000  | 0.003145000000  |
| C | 2.456834000000  | -0.330783000000 | -0.002765000000 |
| N | 3.475405000000  | 0.573466000000  | 0.001690000000  |
| C | 2.785487000000  | -1.703919000000 | -0.008239000000 |
| C | 4.771695000000  | 0.218993000000  | 0.001128000000  |
| C | 4.108621000000  | -2.077697000000 | -0.008797000000 |
| C | 5.133385000000  | -1.105518000000 | -0.004020000000 |
| H | 1.979406000000  | -2.428594000000 | -0.012089000000 |
| H | 5.486160000000  | 1.035110000000  | 0.004948000000  |
| H | 4.368868000000  | -3.132470000000 | -0.013031000000 |
| H | 6.180294000000  | -1.385634000000 | -0.004396000000 |
| H | -1.637806000000 | 3.268192000000  | -0.881477000000 |
| H | -1.662040000000 | 3.245508000000  | 0.891932000000  |
| H | -0.205117000000 | 3.787661000000  | 0.030831000000  |
| C | -2.401904000000 | -0.040679000000 | -0.004334000000 |
| C | -2.727753000000 | -1.422333000000 | 0.008793000000  |
| C | -3.462810000000 | 0.880690000000  | -0.018307000000 |
| C | -4.067074000000 | -1.824872000000 | 0.010314000000  |
| C | -4.789281000000 | 0.475174000000  | -0.017408000000 |
| C | -5.089589000000 | -0.888502000000 | -0.002407000000 |
| H | -3.241906000000 | 1.941492000000  | -0.031242000000 |
| H | -4.273869000000 | -2.891144000000 | 0.021250000000  |
| H | -5.583130000000 | 1.216492000000  | -0.028685000000 |
| O | -1.796391000000 | -2.391081000000 | 0.020294000000  |
| H | -0.906107000000 | -1.953366000000 | 0.013024000000  |
| O | 1.789217000000  | 2.475297000000  | 0.007725000000  |
| H | -6.124285000000 | -1.221908000000 | -0.001277000000 |
| H | 3.103330000000  | 1.572186000000  | 0.005465000000  |

Table S11. Optimized geometry of the **S<sub>1</sub> state** of **L<sup>OH,OH</sup>** (**T,N-L<sup>H,OH</sup>** form, **S<sub>1</sub><sup>T,N</sup>**) in Cartesian (XYZ) coordinates as calculated in Gaussian at the PBE0/6-31+g(d) level of theory in the gas phase.

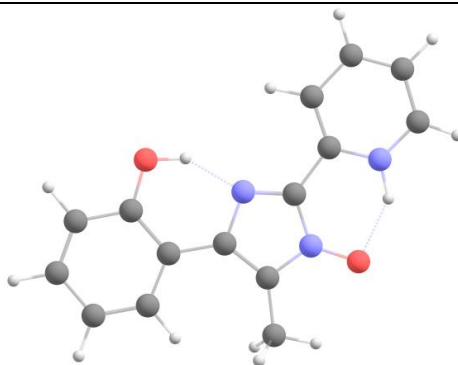

|   |                 |                 |                 |
|---|-----------------|-----------------|-----------------|
| N | -0.046645000000 | -0.060188000000 | -4.012483000000 |
| C | -0.040176000000 | 1.007716000000  | -3.267741000000 |
| C | -0.045876000000 | -1.161106000000 | -3.149734000000 |
| C | -0.038404000000 | -0.705035000000 | -1.831728000000 |
| N | -0.034964000000 | 0.662279000000  | -1.923130000000 |
| C | -0.037820000000 | 2.394104000000  | -3.795981000000 |
| N | -0.024984000000 | 3.340152000000  | -2.846035000000 |
| C | -0.046742000000 | 2.706979000000  | -5.125019000000 |
| C | -0.020068000000 | 4.685736000000  | -3.138864000000 |
| C | -0.041622000000 | 4.120284000000  | -5.485092000000 |
| C | -0.028550000000 | 5.062137000000  | -4.494553000000 |
| H | -0.056710000000 | 1.923922000000  | -5.869648000000 |
| H | -0.009346000000 | 5.368375000000  | -2.302126000000 |
| H | -0.048073000000 | 4.410237000000  | -6.529965000000 |
| H | -0.024454000000 | 6.121618000000  | -4.734434000000 |
| C | -0.034067000000 | -1.349219000000 | -0.495778000000 |
| H | -0.923192000000 | -1.971106000000 | -0.339194000000 |
| H | 0.852952000000  | -1.976103000000 | -0.347365000000 |
| H | -0.028362000000 | -0.561897000000 | 0.263224000000  |
| C | -0.052271000000 | -2.487713000000 | -3.700205000000 |
| C | -0.059362000000 | -2.699921000000 | -5.120042000000 |
| C | -0.051782000000 | -3.632645000000 | -2.870670000000 |
| C | -0.065465000000 | -4.005680000000 | -5.633023000000 |
| C | -0.057836000000 | -4.909209000000 | -3.391198000000 |
| C | -0.064743000000 | -5.095381000000 | -4.785772000000 |
| H | -0.046466000000 | -3.499203000000 | -1.795682000000 |
| H | -0.070722000000 | -4.121222000000 | -6.712372000000 |
| H | -0.057249000000 | -5.766939000000 | -2.725414000000 |
| H | -0.069533000000 | -6.099875000000 | -5.199858000000 |
| O | -0.060551000000 | -1.706067000000 | -6.004081000000 |
| H | -0.055767000000 | -0.842590000000 | -5.504498000000 |
| O | -0.028112000000 | 1.481879000000  | -0.922972000000 |
| H | -0.021119000000 | 2.991541000000  | -1.875077000000 |



Table S12. Optimized geometry of the **T<sub>1</sub> state** of **L<sup>OH,OH</sup>** (**N,N-L<sup>H,OH</sup>** form, **T<sub>1</sub><sup>N,N</sup>**) in Cartesian (XYZ) coordinates as calculated in Gaussian at the PBE0/6-31+g(d) level of theory in the gas phase.

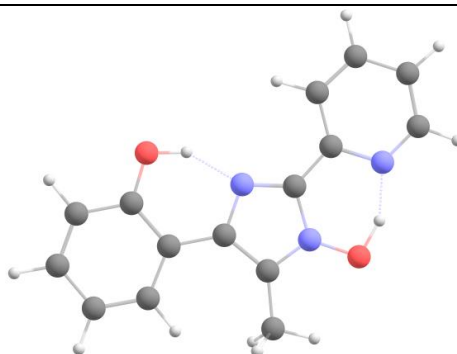

|   |                 |                 |                 |
|---|-----------------|-----------------|-----------------|
| N | -0.111049000000 | -0.082521000000 | -4.123081000000 |
| C | -0.058432000000 | 1.052595000000  | -3.403157000000 |
| C | -0.039548000000 | -1.133279000000 | -3.244586000000 |
| C | 0.063258000000  | -0.646280000000 | -1.903564000000 |
| C | 0.168558000000  | -1.282055000000 | -0.569002000000 |
| N | 0.049573000000  | 0.685759000000  | -2.031918000000 |
| C | -0.093413000000 | 2.384351000000  | -3.804770000000 |
| N | -0.015927000000 | 3.330850000000  | -2.778820000000 |
| C | -0.201142000000 | 2.790065000000  | -5.172645000000 |
| C | -0.044526000000 | 4.610576000000  | -3.102262000000 |
| C | -0.227891000000 | 4.124475000000  | -5.470653000000 |
| C | -0.148169000000 | 5.078868000000  | -4.415968000000 |
| H | -0.259280000000 | 2.028721000000  | -5.944285000000 |
| H | 0.018359000000  | 5.311694000000  | -2.271490000000 |
| H | -0.309175000000 | 4.455747000000  | -6.501985000000 |
| H | -0.166363000000 | 6.144930000000  | -4.613446000000 |
| H | -0.702189000000 | -1.912963000000 | -0.355847000000 |
| H | 1.065775000000  | -1.907245000000 | -0.492582000000 |
| H | 0.225294000000  | -0.504944000000 | 0.196840000000  |
| C | -0.072666000000 | -2.481413000000 | -3.723273000000 |
| C | -0.181911000000 | -2.732236000000 | -5.132247000000 |
| C | -0.001851000000 | -3.601855000000 | -2.859769000000 |
| C | -0.214873000000 | -4.053233000000 | -5.602999000000 |
| C | -0.035593000000 | -4.892549000000 | -3.340616000000 |
| C | -0.143125000000 | -5.117160000000 | -4.724578000000 |
| H | 0.081201000000  | -3.442165000000 | -1.791879000000 |
| H | -0.298195000000 | -4.203530000000 | -6.674989000000 |
| H | 0.020713000000  | -5.730685000000 | -2.652533000000 |
| O | -0.255073000000 | -1.759532000000 | -6.033083000000 |
| H | -0.219331000000 | -0.880163000000 | -5.542463000000 |
| O | 0.125169000000  | 1.559717000000  | -1.007802000000 |
| H | 0.082857000000  | 2.487379000000  | -1.529198000000 |
| H | -0.170173000000 | -6.133523000000 | -5.108419000000 |

Table S13. Optimized geometry of the **T<sub>1</sub> state** of **L<sup>OH,OH</sup>** (**T,N-L<sup>H,OH</sup>** form, **T<sub>1</sub><sup>T,N</sup>**) in Cartesian (XYZ) coordinates as calculated in Gaussian at the PBE0/6-31+g(d) level of theory in the gas phase.



|   |                 |                 |                 |
|---|-----------------|-----------------|-----------------|
| N | -0.111049000000 | -0.082521000000 | -4.123081000000 |
| C | -0.058432000000 | 1.052595000000  | -3.403157000000 |
| C | -0.039548000000 | -1.133279000000 | -3.244586000000 |
| C | 0.063258000000  | -0.646280000000 | -1.903564000000 |
| C | 0.168558000000  | -1.282055000000 | -0.569002000000 |
| N | 0.049573000000  | 0.685759000000  | -2.031918000000 |
| C | -0.093413000000 | 2.384351000000  | -3.804770000000 |
| N | -0.015927000000 | 3.330850000000  | -2.778820000000 |
| C | -0.201142000000 | 2.790065000000  | -5.172645000000 |
| C | -0.044526000000 | 4.610576000000  | -3.102262000000 |
| C | -0.227891000000 | 4.124475000000  | -5.470653000000 |
| C | -0.148169000000 | 5.078868000000  | -4.415968000000 |
| H | -0.259280000000 | 2.028721000000  | -5.944285000000 |
| H | 0.018359000000  | 5.311694000000  | -2.271490000000 |
| H | -0.309175000000 | 4.455747000000  | -6.501985000000 |
| H | -0.166363000000 | 6.144930000000  | -4.613446000000 |
| H | -0.702189000000 | -1.912963000000 | -0.355847000000 |
| H | 1.065775000000  | -1.907245000000 | -0.492582000000 |
| H | 0.225294000000  | -0.504944000000 | 0.196840000000  |
| C | -0.072666000000 | -2.481413000000 | -3.723273000000 |
| C | -0.181911000000 | -2.732236000000 | -5.132247000000 |
| C | -0.001851000000 | -3.601855000000 | -2.859769000000 |
| C | -0.214873000000 | -4.053233000000 | -5.602999000000 |
| C | -0.035593000000 | -4.892549000000 | -3.340616000000 |
| C | -0.143125000000 | -5.117160000000 | -4.724578000000 |
| H | 0.081201000000  | -3.442165000000 | -1.791879000000 |
| H | -0.298195000000 | -4.203530000000 | -6.674989000000 |
| H | 0.020713000000  | -5.730685000000 | -2.652533000000 |
| O | -0.255073000000 | -1.759532000000 | -6.033083000000 |
| H | -0.219331000000 | -0.880163000000 | -5.542463000000 |
| O | 0.125169000000  | 1.559717000000  | -1.007802000000 |
| H | 0.082857000000  | 2.487379000000  | -1.529198000000 |
| H | -0.170173000000 | -6.133523000000 | -5.108419000000 |

Table S14. Optimized geometry of the **T<sub>1</sub> state** of **L<sup>OH,OH</sup>** (**N,T-L<sup>H,OH</sup> form, T<sub>1</sub><sup>N,T</sup>**) in Cartesian (XYZ) coordinates as calculated in Gaussian at the PBE0/6-31+g(d) level of theory in the gas phase.

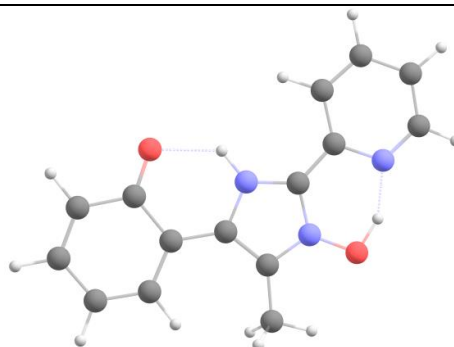

|   |                 |                 |                 |
|---|-----------------|-----------------|-----------------|
| N | -0.107298000000 | -0.070292000000 | -4.076267000000 |
| C | -0.056692000000 | 1.095212000000  | -3.381974000000 |
| C | -0.037604000000 | -1.167452000000 | -3.220463000000 |
| C | 0.061552000000  | -0.653419000000 | -1.925845000000 |
| C | 0.167501000000  | -1.278235000000 | -0.584862000000 |
| N | 0.047566000000  | 0.698731000000  | -2.056656000000 |
| C | -0.093356000000 | 2.426239000000  | -3.804208000000 |
| N | -0.016932000000 | 3.365049000000  | -2.787525000000 |
| C | -0.200607000000 | 2.830744000000  | -5.167879000000 |
| C | -0.045523000000 | 4.651629000000  | -3.107769000000 |
| C | -0.227164000000 | 4.169928000000  | -5.460096000000 |
| C | -0.148470000000 | 5.123199000000  | -4.413647000000 |
| H | -0.259857000000 | 2.085704000000  | -5.956775000000 |
| H | 0.017563000000  | 5.345756000000  | -2.271412000000 |
| H | -0.308447000000 | 4.498349000000  | -6.492802000000 |
| H | -0.167043000000 | 6.188783000000  | -4.613244000000 |
| H | -0.703413000000 | -1.906804000000 | -0.366799000000 |
| H | 1.065614000000  | -1.901123000000 | -0.503895000000 |
| H | 0.223835000000  | -0.495115000000 | 0.174324000000  |
| C | -0.072108000000 | -2.504253000000 | -3.714081000000 |
| C | -0.184502000000 | -2.745221000000 | -5.165793000000 |
| C | -0.002156000000 | -3.621878000000 | -2.858985000000 |
| C | -0.215471000000 | -4.116203000000 | -5.614750000000 |
| C | -0.036511000000 | -4.913983000000 | -3.348346000000 |
| C | -0.144152000000 | -5.163748000000 | -4.738790000000 |
| H | 0.080877000000  | -3.474889000000 | -1.788797000000 |
| H | -0.298606000000 | -4.263914000000 | -6.687437000000 |
| H | 0.020037000000  | -5.748180000000 | -2.654539000000 |
| O | -0.252411000000 | -1.808200000000 | -6.003079000000 |
| O | 0.125721000000  | 1.563351000000  | -1.015321000000 |
| H | 0.084492000000  | 2.488580000000  | -1.512994000000 |
| H | -0.169407000000 | -6.187975000000 | -5.101415000000 |
| H | -0.185094000000 | -0.230064000000 | -5.080413000000 |

Table S15. Optimized geometry of the **T<sub>1</sub> state** of **L<sup>OH,OH</sup>** (**T,T-L<sup>H,OH</sup> form**, **T<sub>1</sub><sup>T,T</sup>**) in Cartesian (XYZ) coordinates as calculated in Gaussian at the PBE0/6-31+g(d) level of theory in the gas phase.

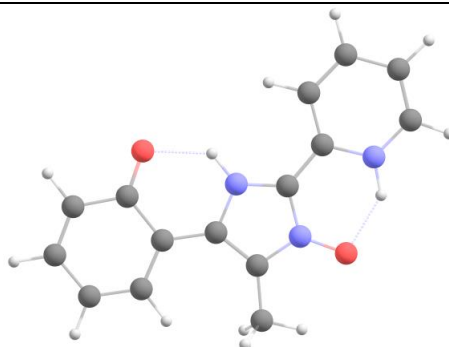

|   |                 |                 |                 |
|---|-----------------|-----------------|-----------------|
| N | -0.102192000000 | -0.064340000000 | -4.011442000000 |
| C | -0.049785000000 | 1.072301000000  | -3.294203000000 |
| C | -0.034326000000 | -1.170656000000 | -3.178261000000 |
| C | 0.065388000000  | -0.672432000000 | -1.877635000000 |
| C | 0.170904000000  | -1.306098000000 | -0.543548000000 |
| N | 0.054126000000  | 0.695287000000  | -1.971688000000 |
| C | -0.090267000000 | 2.404168000000  | -3.765805000000 |
| N | -0.019116000000 | 3.421875000000  | -2.811789000000 |
| C | -0.196418000000 | 2.772457000000  | -5.118776000000 |
| C | -0.050463000000 | 4.729866000000  | -3.166598000000 |
| C | -0.228856000000 | 4.098020000000  | -5.487201000000 |
| C | -0.152988000000 | 5.109240000000  | -4.472706000000 |
| H | -0.252872000000 | 1.993994000000  | -5.874674000000 |
| H | 0.011100000000  | 5.438196000000  | -2.347217000000 |
| H | -0.310860000000 | 4.374683000000  | -6.532783000000 |
| H | -0.175757000000 | 6.162852000000  | -4.726525000000 |
| H | -0.700461000000 | -1.932983000000 | -0.320503000000 |
| H | 1.070160000000  | -1.927404000000 | -0.457879000000 |
| H | 0.226273000000  | -0.508243000000 | 0.202218000000  |
| C | -0.071871000000 | -2.494044000000 | -3.710220000000 |
| C | -0.184786000000 | -2.699946000000 | -5.166439000000 |
| C | -0.003783000000 | -3.627959000000 | -2.879951000000 |
| C | -0.218212000000 | -4.060085000000 | -5.646539000000 |
| C | -0.040398000000 | -4.909768000000 | -3.398191000000 |
| C | -0.148567000000 | -5.127080000000 | -4.793749000000 |
| H | 0.079527000000  | -3.499281000000 | -1.806996000000 |
| H | -0.301725000000 | -4.184123000000 | -6.722209000000 |
| H | 0.014717000000  | -5.759716000000 | -2.723689000000 |
| O | -0.251266000000 | -1.742863000000 | -5.982608000000 |
| O | 0.129772000000  | 1.526199000000  | -0.968735000000 |
| H | -0.175672000000 | -6.142724000000 | -5.179727000000 |
| H | 0.057196000000  | 3.084708000000  | -1.840701000000 |
| H | -0.180127000000 | -0.215605000000 | -5.019900000000 |

Table S16. Optimized geometry of  $L^{OH,OH}$  near  $S_0/S_1$  conical intersection in Cartesian (XYZ) coordinates as calculated in Gaussian at the PBE0/6-31+g(d) level of theory in the gas phase.

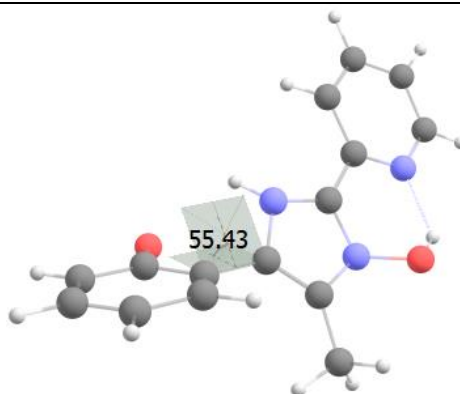

|   |                 |                 |                 |
|---|-----------------|-----------------|-----------------|
| N | -0.150139000000 | -0.078830000000 | -4.036393000000 |
| C | 0.007242000000  | 1.082177000000  | -3.339741000000 |
| C | 0.105821000000  | -1.146964000000 | -3.177735000000 |
| C | 0.400496000000  | -0.667104000000 | -1.955045000000 |
| C | 0.736982000000  | -1.332350000000 | -0.674497000000 |
| N | 0.398285000000  | 0.747387000000  | -2.065253000000 |
| C | -0.190429000000 | 2.412980000000  | -3.779466000000 |
| N | 0.146362000000  | 3.384118000000  | -2.877484000000 |
| C | -0.683025000000 | 2.727860000000  | -5.068301000000 |
| C | 0.025827000000  | 4.649088000000  | -3.257088000000 |
| C | -0.797734000000 | 4.054296000000  | -5.427818000000 |
| C | -0.429450000000 | 5.051786000000  | -4.512789000000 |
| H | -0.976821000000 | 1.935683000000  | -5.750955000000 |
| H | 0.306580000000  | 5.393305000000  | -2.513142000000 |
| H | -1.175515000000 | 4.322274000000  | -6.410711000000 |
| H | -0.507447000000 | 6.105218000000  | -4.758691000000 |
| H | -0.047994000000 | -1.207505000000 | 0.082987000000  |
| H | 0.887525000000  | -2.401419000000 | -0.844668000000 |
| H | 1.658463000000  | -0.908240000000 | -0.260830000000 |
| C | -0.024152000000 | -2.531177000000 | -3.702255000000 |
| C | 0.743368000000  | -2.893100000000 | -4.880554000000 |
| C | -0.912073000000 | -3.419621000000 | -3.152890000000 |
| C | 0.572788000000  | -4.230888000000 | -5.389496000000 |
| C | -1.029350000000 | -4.735337000000 | -3.662551000000 |
| C | -0.278896000000 | -5.128395000000 | -4.774136000000 |
| H | -1.514865000000 | -3.113516000000 | -2.301092000000 |
| H | 1.165549000000  | -4.508582000000 | -6.256316000000 |
| H | -1.704050000000 | -5.438476000000 | -3.184026000000 |
| O | 1.490984000000  | -2.051432000000 | -5.435343000000 |
| H | 0.160173000000  | -0.165753000000 | -5.007068000000 |
| O | -0.158765226215 | 1.437018356216  | -0.986217212986 |
| H | 0.084231226215  | 2.343513643784  | -1.207874787014 |
| H | -0.379106000000 | -6.139621000000 | -5.159629000000 |
